31 **ABSTRACT**

32  
33 Doubling of the full chromosome content -whole genome duplications (WGDs)- is  
34 frequently found in human cancers and is responsible for the rapid evolution of  
35 genetically unstable karyotypes <sup>1-3</sup>. It has previously been established that WGDs fuel  
36 chromosome instability due to abnormal mitosis owing to the presence of extra  
37 centrosomes and extra chromosomes <sup>4-8</sup>. Tolerance to ploidy changes has been  
38 identified in different model organisms and cell types <sup>5,6,9-12</sup>, revealing long term  
39 cellular adaptations that accommodate ploidy increase. Importantly, however, the  
40 immediate consequences of WGDs as cells become tetraploid are not known. It also  
41 remains unknown whether WGD triggers other events leading to genetic instability  
42 (GIN), independently of mitosis. In this study, we induced tetraploidy in diploid  
43 genetically stable RPE-1 cells and monitored the first interphase. We found that newly  
44 born tetraploids undergo high rates of DNA damage during DNA replication. Using  
45 DNA combing and single cell sequencing, we show that replication forks are unstable,  
46 perturbing DNA replication dynamics and generating under- and over-replicated  
47 regions at the end of S-phase. Mechanistically, we found that these defects result from  
48 lack of protein mass scaling up at the G1/S transition, which impairs the fidelity of DNA  
49 replication. This work shows that within a single interphase, unscheduled tetraploid  
50 cells can accumulate highly abnormal karyotypes. These findings provide an  
51 explanation for the GIN landscape that favors tumorigenesis after tetraploidization.

52

53 **MAIN**

54

55 Diploid and stable karyotypes are associated with health and fitness in animals. In  
56 contrast, whole genome duplications (WGDs) are linked to genetic instability (GIN) and  
57 cancer<sup>1,2,13</sup>. WGDs promote chromosomal instability (CIN) over time due to abnormal  
58 mitosis, contributing to the evolution of aneuploid karyotypes<sup>3,6,8,14–16</sup>. These represent  
59 cancer vulnerabilities with therapeutic potential<sup>17,18</sup>. Tolerance to ploidy changes has  
60 been identified in different model organisms and cell types<sup>5,6,9–12</sup>, revealing long-term  
61 cellular adaptations that accommodate ploidy increase. Importantly, however, the  
62 immediate consequences of unscheduled WGDs are not known and their contribution  
63 to GIN remains to be identified. This is an essential question because single WGD  
64 events such as cytokinesis failure can promote tumorigenesis<sup>19</sup>. Identifying the initial  
65 defects derived from WGD and the underlying mechanisms establishing GIN in  
66 tetraploid cells is thus an important step, which requires understanding failure in  
67 maintaining genetic stability. This type of study has the potential to unravel the origins  
68 of GIN in one single cell cycle after WGDs.

69

70 **High levels of DNA damage are generated in the first interphase following**  
71 **unscheduled Whole Genome Duplication (WGD)**

72 To identify the immediate consequences of WGDs, we induced tetraploidization in the  
73 human diploid and genetically stable RPE-1 immortalized cell line, which contains an  
74 almost near-diploid chromosome content. Since WGDs can have different origins<sup>15,20</sup>,  
75 we developed several approaches to induce tetraploidization through either  
76 cytokinesis failure (CF), endoreplication (EnR) or mitotic slippage (MS) (Fig. 1A and  
77 methods). While the large majority of cells resulting from CFs contained two nuclei,  
78 EnR or MS generated mainly mononucleated tetraploid cells (Fig. 1A-B and Extended  
79 data Fig. 1A-I). Importantly, taking together parameters such as cell size, nuclei  
80 number and size, and centrosome number, we were able to distinguish diploids from  
81 tetraploids in all the strategies used (Fig. 1B and Extended data Fig. 1A-I). For each  
82 strategy, a mix of diploid and tetraploid cells was obtained, allowing a comparison of  
83 an internal diploid control and the tetraploid population (Fig. 1C-H, and Extended data  
84 Fig. 1A-I). Importantly, from all the conditions used to induce WGDs, the large majority  
85 of tetraploid cells continued to cycle and enter and exit the first S-phase (see below).  
86 Thus, we have generated the conditions required to study the initial and immediate  
87 consequences of tetraploidy within the first cell cycle.

88 Using an early marker of DNA double strand breaks -  $\gamma$ H2AX-, we characterized  
89 levels of DNA damage in the first interphase following tetraploidization and found high  
90 levels in tetraploid cells. Moreover, this was independent of the way tetraploid cells  
91 were generated. In contrast, diploid cells treated in the same conditions or untreated  
92 diploids showed low levels of DNA damage (Fig. 1C-H, and Extended data Fig. 1A-I,  
93 see Extended data Fig. 2A-C for additional methods of generating tetraploidy). While  
94 most of the diploid cells exhibited a low number of  $\gamma$ H2AX foci, the percentage of  
95 tetraploid cells with more than 10 foci was high (Fig. 1C-H). We found a correlation  
96 between the number of  $\gamma$ H2AX foci and the fluorescence intensity levels of this marker  
97 (Extended data Fig. 1J). For simplicity, we will include the information of the number  
98 of  $\gamma$ H2AX foci per interphase nuclei throughout this study. Since MS generated the  
99 highest frequency of tetraploid cells (Extended data Fig. 1A), we chose to present data  
100 derived from MS throughout this study. To confirm some of our results, we also used  
101 CF or EnR and this will be mentioned in the figure legends and in the methods.

102 Since a tetraploid nucleus contains twice the amount of DNA than a diploid  
103 nucleus, we excluded by normalization with nuclear area or nuclear fluorescence  
104 intensity, an increase of  $\gamma$ H2AX foci due to increased nuclear size (Extended data Fig.  
105 1K-L). Additionally, we confirmed that the high levels of DNA damage found in the first  
106 interphase after tetraploidization were not specific to RPE-1 cells, as the diploid BJ  
107 fibroblast cell line as well as the pseudo diploid human colon carcinoma HCT116 cell  
108 line also displayed high levels of DNA damage upon WGD (Extended data Fig. 2D-E).

109 We next compared the levels of DNA damage detected in tetraploid cells with  
110 the levels of DNA damage in diploid cells generated by replication stress (RS). RS is  
111 the slowing or stalling of replication forks, which can be induced by high doses of  
112 Aphidicolin (APH) or Hydroxyurea (HU), among other challenges <sup>21,22</sup>. Interestingly,  
113 APH or HU generated comparable levels of DNA damage in diploid cells, when  
114 compared to untreated tetraploid cells (Extended data Fig. 1M).

115 Collectively, our results show that a transition from a diploid to tetraploid status  
116 after unscheduled WGD, is accompanied by high levels of DNA damage within the first  
117 cell cycle.

118

### 119 **DNA damage and genetic instability in tetraploid cells is generated during S-** 120 **phase in a DNA replication-dependent manner**

121 We then determined the cell cycle stage in which the DNA damage occurs. We  
122 followed cell cycle progression right after WGD using the fluorescence ubiquitination  
123 cell cycle indicator (FUCCI) system to map the timing of cell cycle progression in  
124 tetraploid cells, allowing us to then monitored the number of  $\gamma$ H2AX foci during the first  
125 G1 and the first S-phase (Fig. 2A-B and Extended data Fig. 3A). During G1, the number  
126 of  $\gamma$ H2AX foci was quite low and comparable to controls. As cells enter S-phase  
127 (t=10hrs), a slight increase in the number of foci in tetraploid nuclei could be observed,  
128 which increased substantially at the end of S-phase (t=16hrs) (Fig. 2A-B and Extended  
129 data Fig. 3A). These results were further confirmed by time lapse imaging using  
130 tetraploid RPE-1 cells tagged with H2B-GFP to visualize DNA and 53BP1-RFP, which  
131 is a double strand break repair factor <sup>23</sup> (Extended data Fig. 3B-C and Extended data  
132 movies 1-2). To confirm that DNA damage in tetraploid cells was induced during S-  
133 phase, we blocked cells at the G1/S transition using high doses of either CDK4/6 or  
134 CDK2 inhibitors for 16 hrs (methods). We chose the 16hrs time period because it  
135 corresponds to the end of S-phase in the cycling population (Fig. 2A-B). Afterwards,

136 CDKs inhibitors were washed out allowing cell cycle progression (Extended data Fig.  
137 3D). G1-arrested tetraploid cells showed low levels of DNA damage, whereas cells  
138 released in S-phase exhibited high levels of DNA damage (Extended data Fig. 3D-G).  
139 Importantly, a certain proportion of  $\gamma$ H2AX foci of S-phase tetraploid cells partially co-  
140 localized with markers of active DNA replication sites visualized by Proliferating Cell  
141 Nuclear Antigen (PCNA) and EdU incorporation (Extended data Fig. 3H).

142 To better characterize DNA damage in tetraploid cells during their first  
143 interphase, we used other markers of the DNA damage signaling and repair pathways.  
144 We found that the number of KU80 and XRCC1 foci, two proteins involved in Non-  
145 Homologous End Joining (NHEJ) <sup>24</sup> remained low (Extended data Fig. 4A-B). In  
146 contrast, the number of RAD51 foci, a protein involved in homologous recombination  
147 (HR), was increased and co-localized with  $\gamma$ H2AX in a fraction of tetraploid cells  
148 (Extended data Fig. 4C-D). This was also the case for Replication protein A (RPA) and  
149 FANCD2 foci, two markers of RS which also co-localized with  $\gamma$ H2AX foci in tetraploid  
150 cells (Extended data Fig. 4E-G). Together, these results demonstrate that tetraploid  
151 cells experience high levels of DNA damage during S-phase progression, which are  
152 recognized by bonafide DNA damage markers and by the HR repair pathway.

153 Based on these results, we hypothesized that DNA damage in tetraploid cells  
154 arises from errors occurring during DNA replication. To test this possibility, we arrested  
155 cells in G1 as described above (Extended data Fig. 3D). We then released them in the  
156 presence of very low doses of APH or PHA, a Cdc7 inhibitor. We used low doses of  
157 these compounds to inhibit DNA replication (detected by absence of EdU) without  
158 generating DNA damage (methods). These conditions resulted in the inhibition of DNA  
159 replication, albeit maintaining the biochemical activity typical of the S-phase nucleus.  
160 Strikingly, the levels of DNA damage in tetraploid cells were dramatically decreased  
161 when DNA replication was inhibited (Fig. 2C-D and Extended data Fig. 4H-J).  
162 Importantly, in the few tetraploid cells that escaped DNA replication inhibition -  
163 revealed by high EdU incorporation - a high number of  $\gamma$ H2AX foci were noticed  
164 (Extended data Fig. 4K-L), confirming the correlation between DNA replication and  
165 DNA damage in tetraploid cells.

166 To characterize DNA replication, we established RPE-1 cell lines stably  
167 expressing PCNA chromobodies. We showed that expression of PCNA chromobodies  
168 does not affect cell cycle progression in RPE-1 cells, confirming its suitability to follow  
169 DNA replication by live imaging (Extended data Fig. 4M). Using this cell line, we

170 performed quantitative 4D live imaging of endogenous DNA replication in diploid and  
171 tetraploid cells (methods). Surprisingly, the comparison between the total number of  
172 PCNA foci during S-phase in diploid and tetraploid RPE-1 cells, revealed a lack of  
173 scaling up with DNA content (Fig. 2E-G), also observed by quantifying the number of  
174 EdU foci (Extended data Fig. 4N). This result suggests that fewer replication sites were  
175 activated in tetraploid S-phase cells, when compared with diploid cells. The volume of  
176 PCNA foci was also lower in tetraploid cells (Fig. 2H). Moreover, timelapse analysis of  
177 PCNA dynamics revealed additional differences. As diploid cells enter S-phase, an  
178 exponential increase in the number of active replication sites was noticed, which was  
179 maintained before undergoing a steep, almost abrupt decreased (Fig. 2E-I, Extended  
180 data Fig. 5A and Extended data movie 3). In contrast, in tetraploid cells the increase  
181 in the number of active sites was more gradual, and the signals associated with DNA  
182 lingered for extended periods of time. Furthermore, the dissociation of PCNA from the  
183 DNA in tetraploid cells occurred much later and also in a progressive manner (Fig. 2E-  
184 I, Extended data Fig. 5A and Extended data movie 4). In line with this, by analyzing  
185 PCNA patterns as a readout of early and late S-phase<sup>25</sup>, we showed that tetraploid  
186 cells spent more time in early S-phase compared to late S-phase (Extended data Fig.  
187 4O). Surprisingly, even if S-phase was longer in tetraploid cells when compared to  
188 diploid cells (Extended data Fig. 4P), this was not sufficient to scale the number of  
189 active replication sites with DNA content. These results suggest that DNA replication  
190 in tetraploid cells is impaired due to both a lack of scaling up in the number of active  
191 replication sites and to a delayed DNA replication timing.

192 To ascertain if these defects impacted replication fork progression, we  
193 performed DNA combing, which allows the visualization of replication origins in single  
194 DNA fibers<sup>26</sup>. We failed to obtain fibers of the required quality in RPE-1 cells despite  
195 several attempts. To overcome this problem, we performed DNA combing in HCT116  
196 cells since they also showed high levels of DNA damage within the first interphase  
197 (Extended data Fig. 2E). Inter-origin distances were not affected in tetraploid cells,  
198 however, and surprisingly, median fork speed was increased in tetraploid cells (Fig. 2J  
199 and Extended data Fig. 4Q). Further, a high increase in the percentage of unstable  
200 forks was also detected (Fig. 2J). These results show that the replication dynamics is  
201 perturbed in tetraploid cells when compared to diploid cells.

202 Since S-phase progression errors and inaccurate DNA replication are linked  
203 with a pleiotropy of DNA structural abnormalities, we assessed if unscheduled

204 tetraploidy was associated with abnormal karyotypes. We FACS sorted tetraploid from  
205 diploid cells (see below, Fig. 3C) in G1 and at the G2/M transition to perform single cell  
206 DNA sequencing (ssDNAseq) (methods). Normalization of the under and over  
207 replicating regions in G1 and G2/M diploid cells revealed already whole chromosome  
208 deviations in a certain number of cells. When present, they span along almost all  
209 chromosomes of a given cell (Extended data Fig. 5B). In G1 tetraploid cells, over  
210 replicated regions (5n) could also be identified, but these were restricted to a few  
211 chromosomes and might be explained by a caveat of the method (cells have initiated  
212 S-phase but were still selected as G1 by the FACS profile). Striking, however in G2/M  
213 tetraploid cells over duplicating chromosomes ( $> 10$ ) could be identified in addition to  
214 frequent over and under replicated regions (9n, 7n and 4n) (Fig. 2K). In agreement  
215 with this variability and the extent of copy number deviations, both aneuploidy score  
216 and heterogeneity score were increased in G2/M tetraploid cells when compared to  
217 G2/M diploid cells (Aneuploidy score: 0.275 vs 0.102; Heterogeneity score 0.319 vs  
218 0.158 respectively) (methods).

219 Together, our results show that unscheduled tetraploid cells cannot sustain  
220 normal DNA replication as they fail to scale proportionally the number of active  
221 replication sites and replication timing. Defects in S-phase result in the generation of  
222 highly aberrant karyotypes, demonstrating a causal relationship between  
223 tetraploidization and GIN within a single S-phase.

224

### 225 **Lack of G1 lengthening in tetraploid cells leads to unprepared S-phase**

226 The massive GIN described above, together with abnormal DNA replication dynamics,  
227 suggested that newly born tetraploid cells undergo the first S-phase in a non-optimal  
228 manner. We reasoned that cells might enter S-phase without the required protein  
229 levels to replicate a tetraploid genome. In principle, doubling the whole set of  
230 chromosomes should lead to an overall doubling of transcripts and protein translation,  
231 so that tetraploid cells should scale up by a factor of 2. To determine if cell mass was  
232 increased in tetraploid cells at the G1-S transition, we combined quantitative phase  
233 imaging with the cell cycle sensor Fucci, which allows recording of mass measure  
234 trajectories through the cell cycle at the single cell level<sup>27</sup>. We found that the proportion  
235 of mass added during G1 was lower in tetraploid cells compared to diploid cells (Fig.  
236 3A-B). These results establish that newly born tetraploid cells are not able to scale  
237 together protein and DNA content during the first G1 upon WGD. We next tested the



238 total levels of key S-phase components. To do so, we used a recently developed  
239 protocol that enables to sort and isolate tetraploid from diploid cells based on FUCCI  
240 and DNA content from a common population (Fig. 3C and Extended data Fig. 6A,  
241 methods). Protein extracts from the two cell populations at the G1/S transition were  
242 then probed by western blot. The same number of cells was loaded for diploid and  
243 tetraploid conditions. Normalization of the chromatin associated H2B variant and the  
244 cytoskeleton component Actin showed an increase in these two protein levels  
245 consistent with DNA doubling (Fig. 3D-E and Extended data Fig. 6B). In stark contrast,  
246 essential S-phase DNA replication factors such as the origin recognition complex 1  
247 (ORC1) involved in the recognition of replication origins <sup>28</sup>, the minichromosome  
248 maintenance 2 (MCM2) helicase <sup>29</sup>, CDC45, a member of the active helicase complex  
249 <sup>30</sup>, and PCNA did not scale up in tetraploid cells (Fig. 3D-F). Combined with quantitative  
250 phase imaging data, these results suggest that tetraploid cells do not contain the  
251 required protein levels to sustain timely and successful DNA replication during S-  
252 phase.

253 In normal proliferative cell cycles, the growth phase occurring during G1 phase  
254 prepares cells for DNA replication allowing the expression and accumulation of key S-  
255 phase regulators <sup>31,32</sup>. We reasoned that a short G1 duration could account for  
256 transition to S-phase in an unprepared manner, which is supported by the fact that  
257 tetraploid cells did not scale up protein content with DNA doubling (Fig. 3A-F). Indeed,  
258 time lapse analysis of tetraploid cells just after birth indicated only a slight increase in  
259 G1 duration, which did not scale with DNA content when compared to diploid cells (Fig.  
260 3G). Further, while we observed a significant correlation between cell mass and G1  
261 duration in diploid cells, also described in other diploid conditions <sup>33</sup>, this correlation  
262 was absent in tetraploid cells suggesting that G1 duration is not dependent of cell mass  
263 in tetraploid cells (Fig. 3H).

264 We next tested if imposing G1 lengthening was translated by increased protein  
265 levels of S-phase factors and thus in principle enabled error-free DNA replication in  
266 tetraploid cells. To test this model, we delayed S-phase entry using very low doses of  
267 CDK4/6 or CDK2 inhibitors. These conditions were different from the ones described  
268 above used to synchronize cells in G1. Indeed, while high doses of these inhibitors  
269 result in a biochemical arrest, low inhibitor doses result in G1 lengthening <sup>34,35</sup>. The  
270 different impact of high and low doses of CDK4/6 or CDK2 inhibitors could be noticed  
271 by differences in the expression levels of DNA replication factors. Indeed, after G1

272 lengthening the levels of DNA replication factors scaled up with DNA content in  
273 tetraploid cells, which was not the case when cells were arrested in G1 (Fig. 3I-K vs  
274 3D-F). Consistent with these findings, after G1 lengthening the number and volume of  
275 active replication sites in the subsequent S-phase visualized by monitoring PCNA or  
276 EdU foci scaled up with DNA content in tetraploid cells (Extended data Fig. 6C-E).  
277 Moreover, after G1 extension, PCNA dynamic behavior in tetraploid cells was  
278 comparable to diploid cells (Fig. 3L and Extended data Fig. 6F and I and Extended  
279 data movies 5-6). Even if the time spent in S-phase was not altered after G1  
280 lengthening, we observed that increasing G1 duration restored the ratio between early  
281 and late S-phase in tetraploid cells, suggesting that DNA replication timing was  
282 reinstated (Extended data Fig. 6G-H). Strikingly, G1 lengthening was sufficient to  
283 significantly reduce DNA damage in tetraploid S-phase cells (Fig. 3M and Extended  
284 data Fig. 6J-L).

285 Altogether, our data show that tetraploid cells transition from G1 to S-phase  
286 prematurely without undergoing scaling of global protein mass, and so they enter in S-  
287 phase with insufficient amounts of DNA replication factors. This impacts the dynamics  
288 and fidelity of DNA replication, generating DNA damage. Importantly, extension of G1  
289 is sufficient to increase the levels of key DNA replication factors, which results in a  
290 significant decrease in DNA damage in tetraploid cells.

291  
292 **G1 lengthening or increased E2F1 levels are sufficient to rescue GIN in tetraploid**  
293 **cells and in polyploid cells *in vivo***

294 From yeast to mammals, the transition from G1 to S-phase is negatively regulated by  
295 members of the retinoblastoma (Rb) protein family, which sequesters the transcription  
296 factor E2F1<sup>31,32,36-38</sup>. E2F1 targets several genes required for entry into S-phase and  
297 DNA replication factors. Since a short G1 does not prepare tetraploid cells for S-phase,  
298 we reasoned that increased levels of E2F1 might override the G1 lengthening defect.  
299 We thus expressed E2F1 in diploid cells (Extended data Fig. 7A), allowing to increase  
300 the expression of DNA replication proteins just before generating tetraploid cells.  
301 Importantly, this was sufficient to rescue the levels of DNA damage in tetraploid cells  
302 (Fig. 4A-B).

303 We recently characterized an *in vivo* model to study the consequences of  
304 polyploidy in *Drosophila* neural stem cells also called neuroblasts (NBs) in the  
305 developing brain<sup>39</sup>. These cells are normally diploid, but through repeated CF can

306 generate highly polyploid NBs (here referred to as unscheduled polyploidy) much  
307 beyond the tetraploidization status (Fig. 4C-D and Extended data Fig. 7B). A key  
308 prediction of our findings is that polyploid NBs should also accumulate high levels of  
309 DNA damage *in vivo*. To test this prediction, we determined the levels of DNA damage  
310 in unscheduled polyploid NBs during interphase using antibodies against  $\gamma$ H2Av to  
311 determine the  $\gamma$ H2Av index (methods). We compared it with diploid NBs and the  
312 programmed polyploid cells from the *Drosophila* salivary gland, which are extremely  
313 large and accumulate more than 2000 chromosomes<sup>40</sup>. This represents a 250- fold  
314 increase in DNA content, when compared with diploid *Drosophila* cells, which contain  
315 only 8 chromosomes. Interestingly, interphase polyploid NBs displayed high levels of  
316 DNA damage, which was not the case in diploid NBs or polyploid cells from the salivary  
317 gland (Fig. 4D-E and Extended data Fig. 7C). We next increased the levels of E2F1  
318 and Rb by over-expressing (OE) in a tissue-specific manner using the UAS-Gal4  
319 system. E2F1OE increases the expression of cell cycle regulators, while RbOE  
320 increases G1 lengthening<sup>41,42</sup>. Strikingly, this was sufficient to decrease substantially  
321 the levels of DNA damage in unscheduled polyploid NBs *in vivo* (Fig. 4F-G and  
322 Extended data Fig. 7D).

323 Taken together, these data show that *in vivo* unscheduled polyploidy is a source  
324 of DNA damage and GIN, which can be inhibited by increased E2F1 or Rb levels.  
325 These results put forward the idea that lack of cell cycle readjustment promotes GIN  
326 and the accumulation of highly complex karyotypes in cells that are not programmed  
327 to increase their DNA content (Fig. 4H).

328  
329 Here, we analyzed the initial defects following WGD and identified a very early  
330 window of high GIN that could promote acquisitions of multiple mutations making it  
331 possible to bypass cell cycle controls while promoting tetraploid cell survival. Our  
332 results are consistent with a model where tetraploid cells transit through the first cell  
333 cycle without preparing the duplication of increased DNA content (Fig. 4H). We found  
334 defective fork progression rates in tetraploid cells, which surprisingly seem to progress  
335 faster than in diploid cells. Although the increased rates remain to be explained, these  
336 may contribute to RS and GIN as recently shown upon PARP inhibition<sup>43</sup> or in  
337 response to decreased levels of MCM proteins<sup>44</sup>. Strikingly, G1 extension or the  
338 increase in the expression levels of cell cycle proteins *in vivo* lowered considerably the  
339 high DNA damage levels of extreme polyploid cells such as the ones generated by

340 repeated CF. These results highlight the importance of keeping constant scaling up  
341 between DNA and protein content to ensure genetic stability and cell homeostasis.

342         The most surprising finding of this study is the lack of scaling up between DNA  
343 and protein content immediately after tetraploidization. In physiological conditions,  
344 such as during animal development, WGDs and polyploidization lead to an overall  
345 scaling up of cell mass and DNA content to favor increase in secretion and metabolic  
346 activity for example <sup>20,45,46</sup>. Our work shows that unscheduled tetraploid or polyploid  
347 cells do not increase cell mass as expected. Why certain key cell cycle and DNA  
348 replication factors fail to be expressed at levels that allow optimal DNA replication  
349 remains to be explained. Importantly, however these results show that an immediate  
350 consequence of unscheduled genome doubling is loss of genetic integrity within a  
351 single S-phase. Interestingly, studies performed on stable tetraploid cells have shown  
352 a remarkable scaling up between protein and DNA content after long term adaptation  
353 <sup>47,48</sup>. It is tempting to propose that in non-physiological conditions, as the ones studied  
354 here, newly born tetraploids do not “feel” the increase in DNA content and so, cannot  
355 adapt G1 duration or protein content in order to replicate a 4N genome. It will be  
356 interesting to identify the molecular mechanisms that promote ploidy increase while  
357 maintaining genetic stability and cell homeostasis.

358

359 **Acknowledgments**

360 The authors acknowledge the Cell and Tissue Imaging platform (PICT-IBiSA), member  
361 of the French National Research Infrastructure France-BioImaging (ANR10-INBS-04)  
362 and the Nikon Imaging center from Institut Curie for microscopy. We thank L.  
363 Guyonnet, A. Chipont and C. Guerrin from the Cytometry platform of Institut Curie. We  
364 thank V. Marthiens, S. Lambert, E. Schwob, J.S. Hoffmann, D. Fachinetti, M. Budzyk,  
365 F. Edwards, O. Goundiam, G. Fantozzi, R. Salamé, A. Goupil and C. Chen for helpful  
366 discussions and/or comments on the manuscript. This work was supported by  
367 FOR2800/STO918-7 to Z.S, ERC CoG (ChromoNumber-LS3, ERC-2016-COG) for  
368 R.B, Institut Curie and the CNRS. The Basto lab is a member of the Cell(n)Scale  
369 Labex.

370

371 **Author contributions**

372 S.G. and R.B. conceived the project and wrote the manuscript. S.G. did most of the  
373 experiments and data analysis presented here. M.N. did the initial observations of high  
374 levels of DNA damage in *Drosophila* polyploid NBs. S.V.B., K.K. and Z.S. did the DNA  
375 combing. R.W., A.E.T., D.C.J.S. and F.F. did the scSeq and BI analysis. A.S.M helped  
376 with image quantifications and analysis. N.S. and M.P. performed the quantitative  
377 phase imaging experiments and analysis and H.H. contributed with unpublished cell  
378 lines. All authors read and comment on the manuscript.

379

380 **METHOD DETAILS:**

381 **Cell culture, generation of cell lines and treatments:**

382 *Cell culture:*

383 Cells were maintained at 37°C in a 5% CO<sub>2</sub> atmosphere. hTERT RPE-1 cells (ATCC  
384 Cat# CRL-4000, RRID:CVCL\_4388) and HEK293 cells (ATCC Cat# CRL-1573,  
385 RRID:CVCL\_0045) were grown in Dulbecco's modified medium (DMEM) F12 (11320-  
386 033 from Gibco) containing 10% fetal bovine serum (GE Healthcare), 100 U/ml  
387 penicillin, 100 U/ml streptomycin (15140-122 from Gibco). BJ cells (ATCC Cat# CRL-  
388 4001, RRID:CVCL\_6573) and HCT116 cells (ATCC Cat# CCL-247,  
389 RRID:CVCL\_0291) were grown in Dulbecco's modified medium + GlutaMAX (61965-  
390 026 from Gibco) containing 10% fetal bovine serum (GE Healthcare), 100 U/ml  
391 penicillin, 100 U/ml streptomycin (15140-122 from Gibco).

392

393 All cells were routinely checked for mycoplasma infection.

394

395 *Generation of RPE-1 PCNA<sup>chromo</sup> stable cell line:*

396 RPE-1 cells were transfected with 10µg Cell Cycle-Chromobody® plasmid (TagRFP)  
397 (From Chromotek, Planegg, Germany) using JET PRIME kit (Polyplus Transfection,  
398 114-07) according to the manufacturer protocol. After 24 hours, 500µg/ml G418  
399 (4727878001 from Sigma Aldrich) was added to the cell culture medium and then  
400 clones expressing PCNA chromobodies were selected.

401

402 *Generation of a RPE-1 Fucci or RPE-1 CCNB1<sup>AID</sup> Fucci stable cell line:*

403 To produce lentiviral particles, HEK293 cells were transfected with 4µg pBOB-EF1-  
404 FastFucci-Puro (86849 from Addgene, RRID:Addgene\_86849) + 4µg pMD2.G  
405 (12259 from Addgene, RRID:Addgene\_12259) + 4µg psPAX2 (12260 from Addgene,  
406 RRID:Addgene\_12260) using FuGENE HD Transfection Reagent (E2311 from  
407 Promega) in OptiMEM medium (51985034 from ThermoFisher). Cells were incubated  
408 at 37°C in a 5% CO<sub>2</sub> atmosphere for 16 hours and then growth media were removed  
409 and replaced by 5 ml fresh OptiMEM. The following day, viral particles were isolated  
410 by filtering the medium containing the viral particles through a 0.45µm filter (16537  
411 from Sartorius stedim biotech). Then, RPE-1 or RPE-1 CCNB1<sup>AID</sup> 49 cells were  
412 incubated with viral particles in the presence of 8µg/ml polybrene (sc-134220 from  
413 Santa Cruz) at 37°C in a 5% CO<sub>2</sub> atmosphere for 24 hours. RPE-1 GFP and RFP-

414 positive cells were then collected using Sony SH800 FACS (BD FACSDiva Software  
415 Version 8.0.1). RPE-1 or RPE-1 CCNB1<sup>AID</sup> clones expressing FUCCI were selected  
416 and the cell lines were established from one single clone.

417 pBOB-EF1-FastFUCCI-Puro was a gift from Kevin Brindle & Duncan Jodrell (Addgene  
418 plasmid # 86849 ; <http://n2t.net/addgene:86849> ; RRID:Addgene\_86849)<sup>50</sup>.

419

420 *Generation of RPE-1 GFP-53BP1 RFP-H2B stable cell line:*

421 This cell line was obtained as described below. Briefly, to produce lentiviral particles,  
422 HEK293 cells were transfected with 4µg pSMPUW-IRIS-Neo-H2BmRFP (Fachinetti  
423 Lab) + 4µg pMD2.G (12259 from Addgene, RRID:Addgene\_12259) + 4µg psPAX2  
424 (12260 from Addgene, RRID:Addgene\_12260). Then, RPE-1 cells were incubated with  
425 viral particles and RPE-1 RFP-positive cells were collected using Sony SH800 FACS  
426 (BD FACSDiva Software Version 8.0.1). RPE-1 clones expressing RFP-H2B were  
427 selected, and the cell line was established from one single clone.

428 Then, new lentiviral particles were produced by transfecting HEK293 cells with 4µg  
429 Apple-53BP1trunc (69531 from Addgene, RRID:Addgene\_69531) + 4µg pMD2.G  
430 (12259 from Addgene, RRID:Addgene\_12259) + 4µg psPAX2 (12260 from Addgene,  
431 RRID:Addgene\_12260). RPE-1 RFP-H2B cells were incubated with viral particles and  
432 RPE-1 clones expressing both RFP-H2B and GFP-53BP1 were selected using flow  
433 cytometry (FACS SH800 from Sony) and the cell line was established from one single  
434 clone.

435 Apple-53BP1trunc was a gift from Ralph Weissleder (Addgene plasmid # 69531 ;  
436 <http://n2t.net/addgene:69531> ; RRID:Addgene\_69531)<sup>51</sup>.

437

438 *Generation of tetraploid cells:*

439 **Mitotic slippage using drugs:** cells were incubated with DMSO (D8418 from Sigma  
440 Aldrich) or with 50µM monastrol (S8439 from Selleckchem) + 1µM MPI-0479605  
441 (S7488 from Selleckchem) for at least two hours. This approach was used in Fig. 1B-  
442 D; Fig. 2A-I; Fig. 3L-M; Fig. 4A-B; Extended data Fig. 1A-C and I-M; Extended data  
443 Fig. 2D-E; Extended data Fig.3B-E and G-H; Extended data Fig. 4A-H; K and N-P;  
444 Extended data Fig. 5A; Extended data Fig. 6C-H and J-L; Extended data Fig. 7A.

445 **Mitotic slippage using genetic tools:** CCNB1 depletion in RPE CCNB1<sup>AID</sup> cells was  
446 induced as described before<sup>49</sup>. Briefly, cells were treated with 2µg/ml doxycycline  
447 (D3447 from Sigma Aldrich) + 3µM asunaprevir (S4935 from Selleckchem) for 2 hours.

448 Then, 500  $\mu$ M auxin (I5148 from Sigma Aldrich) was added to the cell culture medium  
449 for at least 4 hours. This approach was used in Fig1K; Fig. 3A-K; Extended data Fig.  
450 2A; Extended data Fig. 6A-B.

451 **Cytokinesis failure using drugs:** cells were incubated with 10 $\mu$ M genistein (G6649  
452 from Sigma Aldrich) for at least two hours. This approach was used in Fig. 1E-F;  
453 Extended data Fig. 1DF; Extended data Fig. 2D-E; Extended data Fig. 3A and F;  
454 Extended data Fig. 3I-J; Extended data Fig. 6I. Alternatively, cell were incubated with  
455 0.75 $\mu$ M Dihydrocytochalasin D (D1641 from Sigma-Aldrich) for 1 hour. This approach  
456 was used in Fig. 2J; Extended data Fig. 2B; Extended data Fig. 4Q.

457 **Endoreplication using drugs:** cells were incubated with 10 $\mu$ M SP600125 (S1460  
458 from Selleckchem) for at least two hours. This approach was used in Fig. 1G-H and  
459 Extended data Fig. 1G-I.

460 **Endoreplication using genetic tools:** CCNA2 depletion in RPE CCNA2<sup>AID</sup> cells was  
461 induced as described before<sup>49</sup>. Briefly, cells were treated with 2 $\mu$ g/ml doxycycline  
462 (D3447 from Sigma Aldrich) for 2 hours. Then, 500  $\mu$ M auxin (I5148 from Sigma  
463 Aldrich) + 3 $\mu$ M asunaprevir (S4935 from Selleckchem) was added to the cell culture  
464 medium for at least 4 hours. This approach was used in Extended data Fig. 2C.

465

466 *Cell cycle synchronization and DNA replication inhibition:*

467 Cells were treated with 1 $\mu$ M palbociclib (Cdk4/6 inhibitor, S1579 from Selleckchem),  
468 with 0.5 $\mu$ M abemaciclib (Cdk4/6 inhibitor, S5716 from Selleckchem) or with 1 $\mu$ M  
469 K03861(Cdk2 inhibitor, S8100 from Selleckchem) for 16 hours to synchronize cells at  
470 G1/S transition and were collected (indicated by “G1 arrest” in the figures).  
471 Alternatively, cells were then washed five times using PBS 1X and released in S-phase  
472 for 10 hours before being collected (indicated by “Release in S-phase” in the figures).  
473 To inhibit DNA replication, cells were released in S-phase in the presence of low doses  
474 of Aphidicolin (APH, A0781 from Sigma-Aldrich), a DNA replication polymerase  
475 inhibitor, or of PHA767491 (PZ0178 from Sigma-Aldrich), a Cdc7 inhibitor (indicated  
476 by “Release in S-phase + APH” or “Release in S-phase + PHA”, respectively, in the  
477 figures). Doses were chosen to significantly decrease EdU incorporation without  
478 affecting the levels of DNA damage.

479

480 *Treatments:*



| <b>Names:</b>                           | <b>Companies:</b> | <b>Targets:</b> | <b>References:</b> | <b>Concentrations:</b>   |
|-----------------------------------------|-------------------|-----------------|--------------------|--------------------------|
| <b>Auxin</b>                            | Sigma             | AID system      | I5148              | 500 $\mu$ M              |
| <b>Doxycycline</b>                      | Sigma Aldrich     | AID system      | D3447              | 2 $\mu$ g/ml             |
| <b>Asunaprevir</b>                      | Selleckchem       | AID system      | S4935              | 3 $\mu$ M                |
| <b>Monastrol</b>                        | Selleckchem       | Eg5             | S8439              | 50 $\mu$ M               |
| <b>MPI-0479605</b>                      | Selleckchem       | MPS1            | S7488              | 1 $\mu$ M                |
| <b>Genistein</b>                        | Sigma Aldrich     | MKLP1           | G6649              | 10 $\mu$ M               |
| <b>SP600125</b>                         | Selleckchem       | JNK             | S1460              | 10 $\mu$ M               |
| <b>Abemaciclib</b>                      | Selleckchem       | CDK4/6          | S5716              | 50nM or 0.5 $\mu$ M      |
| <b>K03861</b>                           | Selleckchem       | CDK2            | S8100              | 400nM or 1 $\mu$ M       |
| <b>Palbociclib</b>                      | Selleckchem       | CDK4/6          | S1579              | 120nM or 1 $\mu$ M       |
| <b>Aphidicolin</b>                      | Sigma Aldrich     | DNA polymerase  | A0781              | 0.4 $\mu$ M or 1 $\mu$ M |
| <b>Hydroxyurea</b>                      | Selleckchem       | RNR             | S1896              | 2mM                      |
| <b>PHA 767491</b>                       | Sigma Aldrich     | Cdc7            | PZ0178             | 1 $\mu$ M                |
| <b>RO3306</b>                           | Calbiochem        | CDK1            | 217699             | 10 $\mu$ M               |
| <b>Dihydrocytochalasin D</b>            | Sigma Aldrich     | Actin           | D1641              | 0.75 $\mu$ M             |
| <b>5'-Chloro-2'-deoxyuridine (CldU)</b> | Sigma Aldrich     | DNA             | C6891              | 100 $\mu$ M              |
| <b>5'-Iodo-2'-deoxyuridine (IdU)</b>    | Sigma Aldrich     | DNA             | I7125              | 100 $\mu$ M              |

481

482 **Fly husbandry and fly stocks:**

483 Flies were raised on cornmeal medium (0.75% agar, 3.5% organic wheat flour, 5.0%  
484 yeast, 5.5% sugar, 2.5% nipagin, 1.0% penicillin-streptomycin and 0.4% propionic  
485 acid). Fly stocks were maintained at 18°C. Crosses were carried out in plastic vials  
486 and maintained at 25°C. Stocks were maintained using balancer inverted  
487 chromosomes to prevent recombination. Stocks used in this study: *sqh1*<sup>52</sup>, *pavarotti*  
488 RNAi (BL#42573 from Bloomington Drosophila Stock Center, Indiana University, IN,  
489 USA)<sup>39</sup>, UAS-E2F1 (F001065 from FlyORF, Zurich, Switzerland) and UAS-Rb (BL#  
490 50746 from Bloomington Drosophila Stock Center, Indiana University, IN, USA).

491 In all experiments, larvae were staged to obtain comparable stages of development.  
492 Egg collection was performed at 25°C for 24 hours. After development at 25°C, third  
493 instar larvae were used for dissection.

494

495 **Immunofluorescence microscopy and antibodies:**

496 *Preparation and imaging of human cells*

497 Cells were plated on cover slips in 12-well plates and treated with the indicated drugs.  
498 To label cells, they were fixed using 4% of paraformaldehyde (15710 from Electron  
499 Microscopy Sciences) + Triton X-100 (2000-C from Euromedex) 0,1% in PBS (20 min  
500 at 4°C). Then, cells were washed three times using PBS-T (PBS 1X + 0,1% Triton X-  
501 100 + 0,02% Sodium Azide) and incubated with PBS-T + BSA (04-100-812-C from  
502 Euromedex) 1% for 30 min at RT. After three washes with PBS-T + BSA, primary and  
503 secondary antibodies were incubated in PBS-T + BSA 1% for 1 hr and 30 min at RT,  
504 respectively. After two washes with PBS, cells were incubated with 3 µg/ml DAPI (4',6-  
505 diamidino-2-phenylindole; D8417 from Sigma Aldrich) for 15 min at RT. After two  
506 washes with PBS slides were mounted using 1.25% n-propyl gallate (Sigma, P3130),  
507 75% glycerol (bidistilled, 99.5%, VWR, 24388-295), 23.75% H<sub>2</sub>O.

508

509 Images were acquired on an upright widefield microscope (DM6B, Leica Systems,  
510 Germany) equipped with a motorized XY and a 40X objective (HCX PL APO 40X/1,40-  
511 0,70 Oil from Leica). Acquisitions were performed using Metamorph software  
512 (Molecular Devices, USA) and a sCMOS camera (Flash 4V2, Hamamatsu, Japan).  
513 Stacks of conventional fluorescence images were collected automatically at a Z-  
514 distance of 0.5 µm (Metamorph software; Molecular Devices, RRID:SCR\_002368).  
515 Images are presented as maximum intensity projections generated with ImageJ  
516 software (RRID:SCR\_002285).

517

518 *Whole mount tissue preparation and imaging of Drosophila larval brains*

519 Brains or Salivary glands from third instar larvae were dissected in PBS and fixed for  
520 30 minutes in 4% paraformaldehyde in PBS. They were washed three times in PBST  
521 0.3% (PBS, 0.3% Triton X-100 (T9284, Sigma), 10 minutes for each wash) and  
522 incubated for several hours in agitation at room temperature (RT) and O/N at 4°C with  
523 primary antibodies at the appropriate dilution in PBST 0.3%. Tissues were washed  
524 three times in PBST 0.3% (10 minutes for each wash) and incubated O/N at 4°C with  
525 secondary antibodies diluted in PBST 0.3%. Brains and salivary glands were then  
526 washed two times in PBST 0.3% (30 minutes for each wash), rinsed in PBS and  
527 incubated with 3 µg/ml DAPI (4',6-diamidino-2-phenylindole; D8417 from Sigma

528 Aldrich) at RT for 30min. Brains and salivary glands were then washed in PBST 0.3%  
529 at RT for 30 minutes and mounted in mounting media. A standard mounting medium  
530 was prepared with 1.25% n-propyl gallate (Sigma, P3130), 75% glycerol (bidistilled,  
531 99.5%, VWR, 24388-295), 23.75% H<sub>2</sub>O.

532  
533 Images were acquired on a spinning disk microscope (Gataca Systems, France).  
534 Based on a CSU-W1 (Yokogawa, Japan), the spinning head was mounted on an  
535 inverted Eclipse Ti2 microscope equipped with a motorized XY Stage (Nikon, Japan).  
536 Images were acquired through a 40X NA 1.3 oil objective with a sCMOS camera  
537 (Prime95B, Photometrics, USA). Optical sectioning was achieved using a piezo stage  
538 (Nano-z series, Mad City Lab, USA). Gataca Systems' laser bench was equipped with  
539 405, 491 and 561 nm laser diodes, delivering 150 mW each, coupled to the spinning  
540 disk head through a single mode fibre. Multi-dimensional acquisitions were performed  
541 using Metamorph 7.10.1 software (Molecular Devices, USA). Stacks of conventional  
542 fluorescence images were collected automatically at a Z-distance of 1.5  $\mu$ m  
543 (Metamorph software; Molecular Devices, RRID:SCR\_002368). Images are presented  
544 as maximum intensity projections generated with ImageJ software  
545 (RRID:SCR\_002285).

546

#### 547 *Primary and secondary antibodies*

548 Primary and secondary antibodies were used at the following concentrations: Guinea  
549 pig anti CEP192 antibody (1/500; Basto lab)<sup>53</sup>, rabbit anti beta catenin (1/250; C2206  
550 from Sigma-Aldrich, RRID:AB\_476831), mouse anti-gamma H2A.X phospho S139  
551 (1/1000; ab22551 from Abcam, RRID:AB\_447150), mouse anti-XRCC1 (1/500;  
552 ab1838 from Abcam, RRID:AB\_302636), rabbit anti-Rad51 (1/500; ab133534 from  
553 Abcam, RRID:AB\_2722613), mouse anti-KU80 (1/200; MA5-12933 from  
554 ThermoFisher, RRID:AB\_10983840), rabbit anti-FANCD2 (1/150; NB100-182SS from  
555 Novusbio, RRID:AB\_1108397), rabbit anti- $\gamma$ H2Av (1/500; 600-401-914 from Rockland;  
556 RRID: AB\_11183655), Alexa Fluor® 647 Phalloidin (1/250; A22287 from  
557 ThermoFisher Scientific, RRID:AB\_2620155), goat anti-Rabbit IgG (H+L) Highly  
558 Cross-Adsorbed Secondary Antibody, Alexa Fluor 647 (1/250; A21245 from  
559 ThermoFisher, RRID:AB\_2535813), Goat anti-Guinea Pig IgG (H+L) Highly Cross-  
560 Adsorbed Secondary Antibody, Alexa Fluor 488 (1/250; A11073 from ThermoFisher,  
561 RRID:AB\_253411), Goat anti-Mouse IgG (H+L) Cross-Adsorbed Secondary Antibody,

562 Alexa Fluor 546 (1/250, A11003 from ThermoFisher, RRID:AB\_2534071), Goat anti-  
563 Rabbit IgG (H+L) Highly Cross-Adsorbed Secondary Antibody, Alexa Fluor 546 (1/250;  
564 A-11035 from Thermo Fisher Scientific, RRID:AB\_2534093).

565

### 566 **Quantitative analysis of DNA damage:**

#### 567 *Analysis of Drosophila NBs*

568 Staged 3rd instar larval brains were dissected, stained and imaged using the  
569 procedures described above. We used the  $\gamma$ H2Av primary antibody, which was  
570 preferentially detected using a secondary antibody conjugated Alexa Fluor 546. We  
571 used this secondary antibody because it was found to provide the best signal to noise  
572 ratio.

573 Quantitative analysis of DNA damage was carried out as previously described<sup>39</sup>. In  
574 brief, DNA damage was assessed using a  $\gamma$ H2Av primary antibody detected with an  
575 Alexa Fluor secondary antibody. Confocal volumes were obtained with optical sections  
576 at 1.5 $\mu$ m intervals. Image analysis was performed using Fiji and a custom plugin  
577 developed by QUANTACELL. After manual segmentation of the nuclei, a thresholding  
578 operation was used to determine the percentage of  $\gamma$ H2Av positive pixels (coverage)  
579 and their average intensity in a single z plane in the center of the nucleus. Coverage  
580 and intensity were multiplied to obtain the  $\gamma$ H2Av index.

581

#### 582 *Analysis of human cell lines*

583 For DNA damage quantification, the signals obtained in cultured cells were different  
584 from the signals found in *Drosophila* NBs. To assess DNA damage in human cells, we  
585 used an ImageJ software-based plugin developed by QUANTACELL, where  $\gamma$ H2AX  
586 signals were measured using z-projection stacks after thresholding. Both FI and the  
587 percentage of nuclear coverage was obtained for each nucleus.  $\gamma$ H2AX index was  
588 obtained multiplying FI by the coverage.

589

590 All data plotting and statistical analyses were performed using the GraphPad Prism  
591 software.

592

### 593 **Time lapse microscopy:**

594 Cells were plated on a dish (627870 from Dutscher) and treated with the indicated  
595 drug. Images were acquired on a spinning disk microscope (Gataca Systems, France).  
596 Based on a CSU-W1 (Yokogawa, Japan), the spinning head was mounted on an  
597 inverted Eclipse Ti2 microscope equipped with a motorized XY Stage (Nikon, Japan).  
598 Images were acquired through a 40X NA 1.3 oil objective with a sCMOS camera  
599 (Prime95B, Photometrics, USA). Optical sectioning was achieved using a piezo stage  
600 (Nano-z series, Mad City Lab, USA). Gataca Systems' laser bench was equipped with  
601 405, 491 and 561 nm laser diodes, delivering 150 mW each, coupled to the spinning  
602 disk head through a single mode fiber. Multi-dimensional acquisitions were performed  
603 using Metamorph 7.10.1 software (Molecular Devices, USA). Stacks of conventional  
604 fluorescence images were collected automatically at a Z-distance of 0.5  $\mu\text{m}$   
605 (Metamorph software; Molecular Devices, RRID:SCR\_002368). Images are presented  
606 as maximum intensity projections generated with ImageJ software  
607 (RRID:SCR\_002285), from stacks deconvolved with an extension of Metamorph  
608 software.

609

#### 610 **EdU staining:**

611 EdU incorporation into DNA was visualized with the Click-it EdU imaging kit (C10338  
612 from Life Technologies), according to the manufacturer's instructions. EdU was used  
613 at a concentration of 1  $\mu\text{M}$  (Extended data Fig. 4N and 6E) or 10  $\mu\text{M}$  (Extended data  
614 Fig. 4A and I) for the indicated time. Cells were incubated with the Click-it reaction  
615 cocktail for 15 minutes.

616

#### 617 **FACS sorting of diploid and tetraploid cells:**

618 A mix of diploid and tetraploid cells (see "*generation of tetraploid cells*" section) were  
619 incubated with 2  $\mu\text{g}/\text{ml}$  Hoescht (94403 from Sigma Aldrich) for 1 hour at 37°C, 5%  
620 CO<sub>2</sub>. Then, a single cell suspension was generated. Cells were washed using PBS 1X,  
621 the supernatant was removed and cells were resuspended in cold cell culture medium  
622 at  $1 \times 10^7$  cell per ml and kept at 4°C during all the experiment. FACS sorting was  
623 performed using Sony SH800 FACS (BD FACSDiva Software Version 8.0.1).  
624 Compensation was performed using the appropriate negative control samples.  
625 Experimental samples were then recorded and sorted using gating tools to select the  
626 populations of interest. RFP+ / GFP- negative cells (G1 cells) were first selected. Then,  
627 in this population, DNA content was used to segregate diploid (2n) and tetraploid (4n)

628 G1 cells. Once gates have been determined, diploid and tetraploid G1 cells were  
629 sorted into external collection tubes. Post-sort analysis was performed to determine  
630 the purity of the sorted populations (see *Extended data Fig. 6A*).

631

### 632 **E2F1 overexpression:**

633 RPE-1 cells were transfected using 0.25µg pCMVHA E2F1 (24225 from Addgene,  
634 RRID:Addgene\_24225) using JET PRIME kit (Polyplus Transfection, 114-07)  
635 according to the manufacturer's protocol. Five hours later, cells were incubated with  
636 DMSO (D8418 from Sigma Aldrich) or with 50µM monastrol (S8439 from Selleckchem)  
637 + 1µM MPI-0479605 (S7488 from Selleckchem) to generate tetraploid cells. After 2  
638 hours, DMSO or 1µM palbociclib (S1579 from Sellechem) were added to the cell  
639 culture medium for 16 hours. Cells were then fixed in G1 (T0) or washed five times  
640 using PBS and released in S-phase and fixed after 10 hours (T10). The  
641 immunofluorescence protocol is described in the corresponding section.

642 pCMVHA E2F1 was a gift from Kristian Helin (Addgene plasmid # 24225 ;  
643 <http://n2t.net/addgene:24225> ; RRID:Addgene\_24225)<sup>54</sup>.

644

### 645 **Western Blot analysis and antibodies:**

646 Cells were lysed in 8 M urea, 50 mM Tris HCl, pH 7.5 and 150 mM β-mercaptoethanol  
647 (161-0710 from Bio-Rad), sonicated and heated at 95°C for 10 minutes. Samples  
648 (equivalent of 2 x 10<sup>5</sup> cells) were subjected to electrophoresis in NuPAGE Novex 4–  
649 12% Bis-Tris pre-cast gels (NP0321 from Life Technologies). Protein fractions from the  
650 gel were electrophoretically transferred to PVDF membranes (PVDF transfer  
651 membrane; RPN303F from GE). After 1 hr saturation in PBS containing 5% dry non-  
652 fat milk and 0.5% Tween 20, the membranes were incubated for 1 hr with a primary  
653 antibody (see *below*) diluted in PBS containing 5% dry non-fat milk and 0.5% Tween  
654 20. After three 10-min washes with PBS containing 0.5% Tween 20, the membranes  
655 were incubated for 45 min with a 1/2 500 dilution of peroxidase-conjugated antibody  
656 (see *below*). Membranes were then washed three times with PBS containing 0.5%  
657 Tween 20, and the reaction was developed according to the manufacturer's  
658 specifications using ECL reagent (SuperSignal West Pico Chemiluminescent  
659 Substrate; 34080 from Thermo Scientific). Protein levels were normalized using H2B  
660 signal and quantifications were done using Image Lab software version 6.0.1, Bio-Rad  
661 Laboratories.

662

663 *Primary and secondary antibodies were used at the following concentrations:*

664 Mouse anti Tubulin (1/5000; T9026 from Sigma, RRID:AB\_477593), mouse anti  
665 CDC45 (1/500; sc-55569 from Santa Cruz Biotechnology, RRID:AB\_831146), rabbit  
666 anti PCNA (1/500; sc56 from Santa Cruz, RRID:AB\_628110), rabbit anti Actin (1/2000;  
667 A5060 from Sigma-Aldrich, RRID:AB\_476738), mouse anti-H2B (1/1000; sc-515808  
668 from Santa Cruz Biotechnology), mouse anti ORC1 (1/500; sc-398734 from Santa  
669 Cruz Biotechnology), mouse anti MCM2 (1/500; 610701 from BD Biosciences,  
670 RRID:AB\_398024), Goat anti-Rabbit IgG (H+L) Cross-Adsorbed Secondary Antibody,  
671 HRP (1/2500; G21234 from ThermoFisher, RRID:AB\_2536530), Peroxidase AffiniPure  
672 Goat Anti-Mouse IgG (H+L) (1/2500; 115-035-003 from Jackson ImmunoResearch,  
673 RRID:AB\_10015289).

674

675 **3D reconstruction and analysis on Imaris:**

676 3D movies (see *time lapse microscopy* section) were imported into Imaris software  
677 v.9.6.0 (Bitplane, RRID:SCR\_007370). For chosen cells, the module “Spot tracking” of  
678 Imaris was used to detect the foci, as spots of diameter 0.5  $\mu\text{m}$  in the XY-direction and  
679 1 $\mu\text{m}$  in Z-direction (modelling PSF elongation). Because the volume of the foci  
680 changes in time, the option “Enable growing regions” was used. In each movie, the  
681 threshold was chosen on the brightest frame (to detect a maximum of the correct spots)  
682 and then applied to the whole movie. For each cell, at each time point, the number of  
683 spots and volumes were recorded. For each condition, at least 10 cells were studied  
684 and the statistics from Imaris were averaged at each time point using a MATLAB script.

685

686 **Molecular combing and antibodies:**

687 Tetraploid HCT116 were generated by cytokinesis inhibition using 0.75  $\mu\text{M}$   
688 dihydrocytochalasin D (DCD, inhibitor of actin polymerization, D1641 from Sigma-  
689 Aldrich) for 18 h overnight. Afterwards, the cells were washed three times with PBS  
690 and cultured in DMEM supplemented with 10% FBS and 1% Pen/Strep for additional  
691 10 h. Cells were pulse-labelled with 0.1 mM CldU and 0.1 mM IdU for 30min and 100  
692 000 cells per condition were collected for further analysis. The DNA was extracted from  
693 cells and prepped following the manufacturer’s instructions using the FiberPrep® DNA  
694 Extraction Kit (Genomic Vision, Bagnex, France). Subsequently, the prepped DNA  
695 was stretched onto coated glass coverslips (CombiCoverslips™, Genomic Vision,

696 Bagneux, France) by using the FiberComb Molecular Combing System (Genomic  
697 Vision, Bagneux, France). The Labelling was performed with antibodies against  
698 ssDNA, IdU and CldU using the Replication Combing Assay (RCA) (Genomic Vision,  
699 Bagneux, France). The imaging of the prepared cover slips was carried out by  
700 Genomic Vision (Bagneux, France) and analysed using the FiberStudio® 2.0.1  
701 Analysis Software by Genomic Vision.

702

703 *Antibodies were used at the following concentrations:*

704 Rabbit anti ssDNA (1/5; 18731 from IBL International, RRID:AB\_494649), Rat anti  
705 CldU (1/10; Ab6326 from Abcam, RRID:AB\_2313786), Mouse anti IdU (1/10; 555627  
706 from BD Biosciences, RRID:AB\_10015222), mouse Alexa Fluor 647 Donkey (1/25;  
707 JIM-715-605-151 from Biozol), Rat Alexa Fluor 594 Donkey (1/25; JIM-712-585-153  
708 from Biozol), Rabbit Brilliant Violet 480 Donkey (1/25; 711-685-152 from Jackson  
709 Immuno Research, RRID:AB\_2651109).

710

### 711 **Quantitative phase imaging and measurements**

712 Cells were plated on glass-bottom dishes coated with 50 µg/ml Fibronectin for 1 hour  
713 and rinsed, and trypsinised cells were plated at a concentration of  $1.5 \times 10^6$  cells/ml. The  
714 cells used for the experiments were seeded in T-25 dishes at a concentration of  $0.7 \times 10^6$   
715 cells/ml 2 days before the actual experiment. On the day of the experiment, the cells  
716 were detached with EDTA (versene), and plated at a concentration of  $1.5 \times 10^6$  cells/ml.  
717 For inducing tetraploidy, cells were treated with 2µg/ml doxycycline (D3447 from Sigma  
718 Aldrich) for 2 hours. Then, 500 µM auxin (I5148 from Sigma Aldrich) + 3µM asunaprevir  
719 (S4935 from Selleckchem) was added to the cell culture medium for at least 4 hours.  
720 The cells were then imaged for 35 hours every 20 minutes to track them throughout  
721 their cell cycle.

722 The cell cycle state of the cells was indicated by the FUCCI system; G1 cells express  
723 Cdt1-RFP while S/G2 cells express hGeminin-GFP and mitosis is indicated by the  
724 NEBD with geminin being present through the cells<sup>55</sup>. To quantify the fluorescence of  
725 geminin in the nucleus, first a background subtraction was performed on the images.  
726 An ROI was used to define an area containing the background fluorescence in the  
727 image. An average value of the ROI was then subtracted from all the frames.  
728 Subsequently, a ROI was drawn as close as possible to the cell, and then the mean



729 gray value was measured across all the frames. This helped identify the frames of birth  
730 and G1/S transition during cell cycle.

731 A detailed protocol for the mass measurement with phasics camera is available in <sup>56,57</sup>.  
732 Images were acquired by Phasics camera every 20 min for 35 hours for the duration  
733 of the experiment. To obtain the reference image, 32 empty fields were acquired on  
734 the dish and a median image was calculated. This reference image was subtracted  
735 from the interferograms (images acquired by phasics) by custom written MATLAB  
736 scripts to measure the optical path difference. They were then processed to calculate  
737 the phase, intensity and phase cleaned images (the background set to 1000 and the  
738 field cropped to remove edges). Background normalization was performed using a  
739 gridfit method and a watershed algorithm was used to separate cells which came in  
740 contact with each other. Mass was calculated by integrating the intensity of the whole  
741 cell.

742

#### 743 **Sequencing and AneuFinder analysis:**

744 A mixed population of diploid and tetraploid RPE-1 CCNB1<sup>AID</sup> FUCCI cells were  
745 synchronized in G1 using 1 $\mu$ M palbociclib (S1579 from Selleckchem) for 16 hours or  
746 released in S-phase for 20 hours in the presence of 10 $\mu$ M RO3306 (217699 from  
747 Calbiochem) in order to block cells in the subsequent G2/M. G1 and G2/M diploid and  
748 tetraploid cells were then isolated using cell sorting (see “*FACS sorting of diploid and*  
749 *tetraploid cells*” section) and collected in a 96-well plate. Single-cell sequencing was  
750 performed as described in detail in <sup>58</sup>. Briefly, cells were lysed to prepare a suspension  
751 of nuclei and sorted as single nuclei in 96 or 384 well plates. Next, single cell  
752 sequencing libraries were prepared using a semi-automated liquid handler platform  
753 (Bravo, Agilent technologies). For library preparation, chromatin was fragmented by  
754 micrococcal nuclease, end-repaired, and A-tailed, followed by Illumina adapter ligation.  
755 Libraries were then cleaned up and PCR-amplified for 17 cycles that included the  
756 addition of a library-specific barcode to uniquely label individual cell libraries. Up to 384  
757 libraries were pooled and sequenced on a Nextseq 500 machine (Illumina; up to 77  
758 cycles; single end). The generated data were subsequently demultiplexed using  
759 sample-specific barcodes and changed into fastq files using bcl2fastq (Illumina;  
760 version 1.8.4). Reads were afterwards aligned to the human reference genome  
761 (GRCh38/hg38) using Bowtie2 (version 2.2.4)<sup>59</sup>. Duplicate reads were marked with  
762 BamUtil (version 1.0.3)<sup>60</sup>. The aligned read data (bam files) were analyzed with a copy

763 number calling algorithm called AneuFinder (<https://github.com/ataudt/aneufinder>)<sup>61</sup>.  
764 Following GC correction and blacklisting of artefact-prone regions (extreme low or high  
765 coverage in control samples), libraries were analyzed using the dnacopy and edivisive  
766 copy number calling algorithms with variable width bins (average binsize = 1 Mb; step  
767 size = 500 kb). The G1 samples were used as reference for the analysis of the G2/M  
768 samples (G1 diploid for G2/M diploid and G1 polyploid for G2/M polyploid). The G1  
769 samples were analyzed with an euploid reference<sup>62</sup>. Results were afterwards curated  
770 by requiring a minimum concordance of 90 % (4N and 8N samples) or 95% (2N  
771 samples) between the results of the two algorithms. Libraries with on average less than  
772 10 reads per bin (~ 30,000 reads for a diploid genome) were discarded. The aneuploidy  
773 scores corresponds to the absolute difference from euploid genome and is the average  
774 from all bins and all libraries of one sample. Heterogeneity scores is calculated as the  
775 proportion of pairwise comparisons, between libraries, that shows different copy  
776 numbers. This is first calculated for each bin. To get to the final score a weighted  
777 average is applied.

778

## 779 **QUANTIFICATION AND STATISTICAL ANALYSIS:**

780

### 781 *Quantifications:*

782 Image analysis and quantifications were performed using Image J software  
783 V2.1.0/1.53c, <https://imagej.net/software/fiji/downloads>. To quantify the colocalizations  
784 between two signals (Extended data Fig. 3M and 4D) we used *JACOP* plugin with  
785 Image J software. 3D movies (Fig. 2F and Extended data Fig. 3B) were corrected using  
786 *3D correct drift* plugin with Image J software to keep the cell of interest at the centre of  
787 the region of interest. The nuclear area and DAPI intensity were measured using the  
788 *wand* tool with Image J software. For the figures, images were processed on Image J  
789 software, and mounted using Affinity Designer, <https://affinity.serif.com/fr/designer/>.

790

### 791 *Statistical analysis:*

792 At least three (n) independent experiments were carried out to generate each dataset,  
793 and the statistical significance of differences was calculated with Student's t-test.  
794 These tests were performed using GraphPad Prism (RRID:SCR\_002798) version 7.00  
795 for Mac, GraphPad Software, La Jolla California USA, [www.graphpad.com](http://www.graphpad.com).

796



798 **REFERENCES:**

799

- 800 1. Zack, T. I. *et al.* Pan-cancer patterns of somatic copy number alteration. *Nat.*  
801 *Genet.* **45**, 1134–1140 (2013).
- 802 2. Bielski, C. M. *et al.* Genome doubling shapes the evolution and prognosis of  
803 advanced cancers. *Nat. Genet.* **50**, 1189–1195 (2018).
- 804 3. López, S. *et al.* Interplay between whole-genome doubling and the  
805 accumulation of deleterious alterations in cancer evolution. *Nat. Genet.* **52**,  
806 283–293 (2020).
- 807 4. Storchova, Z. & Kuffer, C. The consequences of tetraploidy and aneuploidy.  
808 *Journal of Cell Science* vol. 121 3859–3866 (2008).
- 809 5. Storchova, Z. & Pellman, D. From polyploidy to aneuploidy, genome instability  
810 and cancer. *Nature Reviews Molecular Cell Biology* vol. 5 45–54 (2004).
- 811 6. Dewhurst, S. M. *et al.* Tolerance of whole- genome doubling propagates  
812 chromosomal instability and accelerates cancer genome evolution. *Cancer*  
813 *Discov.* **4**, 175–185 (2014).
- 814 7. Fox, D. T., Gall, J. G. & Spradling, A. C. Error-prone polyploid mitosis during  
815 normal *Drosophila* development. *Genes Dev.* **24**, 2294–2302 (2010).
- 816 8. Goupil, A. *et al.* Chromosomes function as a barrier to mitotic spindle bipolarity  
817 in polyploid cells. *J. Cell Biol.* **219**, (2020).
- 818 9. Crockford, A. *et al.* Cyclin D mediates tolerance of genome-doubling in cancers  
819 with functional p53. *Ann. Oncol.* **28**, 149–156 (2017).
- 820 10. Potapova, T. A., Seidel, C. W., Box, A. C., Rancati, G. & Li, R. Transcriptome  
821 analysis of tetraploid cells identifies cyclin D2 as a facilitator of adaptation to  
822 genome doubling in the presence of p53. *Mol. Biol. Cell* **27**, 3065–3084 (2016).
- 823 11. Andreassen, P. R., Lohez, O. D., Lacroix, F. B. & Margolis, R. L. Tetraploid  
824 state induces p53-dependent arrest of nontransformed mammalian cells in G1.  
825 *Mol. Biol. Cell* **12**, 1315–1328 (2001).
- 826 12. Storchová, Z. *et al.* Genome-wide genetic analysis of polyploidy in yeast.  
827 *Nature* **443**, 541–547 (2006).
- 828 13. Carter, S. L. *et al.* Absolute quantification of somatic DNA alterations in human  
829 cancer. *Nat. Biotechnol.* **30**, 413–421 (2012).
- 830 14. Ganem, N. J., Storchova, Z. & Pellman, D. Tetraploidy, aneuploidy and cancer.  
831 *Current Opinion in Genetics and Development* vol. 17 157–162 (2007).

- 832 15. Gemble, S. & Basto, R. CHRONOCRISIS: When Cell Cycle Asynchrony  
833 Generates DNA Damage in Polyploid Cells. *BioEssays* **42**, (2020).
- 834 16. Kuznetsova, A. Y. *et al.* Chromosomal instability, tolerance of mitotic errors and  
835 multidrug resistance are promoted by tetraploidization in human cells. *Cell*  
836 *Cycle* **14**, 2810–2820 (2015).
- 837 17. Jemaà, M. *et al.* Whole-genome duplication increases tumor cell sensitivity to  
838 MPS1 inhibition. *Oncotarget* **7**, 885–901 (2016).
- 839 18. Quinton, R. J. *et al.* Whole-genome doubling confers unique genetic  
840 vulnerabilities on tumour cells. *Nature* **590**, 492–497 (2021).
- 841 19. Fujiwara, T. *et al.* Cytokinesis failure generating tetraploids promotes  
842 tumorigenesis in p53-null cells. *Nature* **437**, 1043–1047 (2005).
- 843 20. Orr-Weaver, T. L. When bigger is better: The role of polyploidy in  
844 organogenesis. *Trends in Genetics* vol. 31 307–315 (2015).
- 845 21. Zeman, M. K. & Cimprich, K. A. Causes and Consequences of Replication  
846 Stress. *Nat. Cell Biol.* **16**, 2 (2014).
- 847 22. Koundrioukoff, S. *et al.* Stepwise activation of the ATR signaling pathway upon  
848 increasing replication stress impacts fragile site integrity. *PLoS Genet.* **9**,  
849 e1003643 (2013).
- 850 23. Panier, S. & Boulton, S. J. Double-strand break repair: 53BP1 comes into  
851 focus. *Nat. Rev. Mol. Cell Biol.* **15**, 7–18 (2014).
- 852 24. Zhao, B., Rothenberg, E., Ramsden, D. A. & Lieber, M. R. The molecular basis  
853 and disease relevance of non-homologous DNA end joining. *Nat. Rev. Mol.*  
854 *Cell Biol.* **21**, 765–781 (2020).
- 855 25. A, B., T, L. & A, C. Quantitative live imaging of endogenous DNA replication in  
856 mammalian cells. *PLoS One* **7**, (2012).
- 857 26. Michalet, X. *et al.* Dynamic molecular combing: Stretching the whole human  
858 genome for high- resolution studies. *Science (80-. ).* **277**, 1518–1523 (1997).
- 859 27. Zlotek-Zlotkiewicz, E., Monnier, S., Cappello, G., Berre, M. Le & Piel, M.  
860 Optical volume and mass measurements show that mammalian cells swell  
861 during mitosis. *J. Cell Biol.* **211**, 765 (2015).
- 862 28. Tatsumi, Y., Ohta, S., Kimura, H., Tsurimoto, T. & Obuse, C. The ORC1 cycle  
863 in human cells: I. Cell cycle-regulated oscillation of human ORC1. *J. Biol.*  
864 *Chem.* **278**, 41528–41534 (2003).
- 865 29. Remus, D. *et al.* Concerted Loading of Mcm2-7 Double Hexamers around DNA

- 866 during DNA Replication Origin Licensing. *Cell* **139**, 719–730 (2009).
- 867 30. Moyer, S. E., Lewis, P. W. & Botchan, M. R. Isolation of the Cdc45/Mcm2-  
868 7/GINS (CMG) complex, a candidate for the eukaryotic DNA replication fork  
869 helicase. *Proc. Natl. Acad. Sci. U. S. A.* **103**, 10236–10241 (2006).
- 870 31. Bertoli, C., Skotheim, J. M. & De Bruin, R. A. M. Control of cell cycle  
871 transcription during G1 and S phases. *Nature Reviews Molecular Cell Biology*  
872 vol. 14 518–528 (2013).
- 873 32. Pardee, A. B. G1 events and regulation of cell proliferation. *Science (80-. )*.  
874 **246**, 603–608 (1989).
- 875 33. Cadart, C. *et al.* Size control in mammalian cells involves modulation of both  
876 growth rate and cell cycle duration. *Nat. Commun.* **9**, (2018).
- 877 34. DW, F. *et al.* Specific inhibition of cyclin-dependent kinase 4/6 by PD 0332991  
878 and associated antitumor activity in human tumor xenografts. *Mol. Cancer*  
879 *Ther.* **3**, 1427–1437 (2004).
- 880 35. Tan, C. *et al.* Cell size homeostasis is maintained by CDK4-dependent  
881 activation of p38 MAPK. *Dev. Cell* **56**, 1756-1769.e7 (2021).
- 882 36. Charvin, G., Oikonomou, C., Siggia, E. D. & Cross, F. R. Origin of irreversibility  
883 of cell cycle start in budding yeast. *PLoS Biol.* **8**, (2010).
- 884 37. Cross, F. R., Buchler, N. E. & Skotheim, J. M. Evolution of networks and  
885 sequences in eukaryotic cell cycle control. *Philosophical Transactions of the*  
886 *Royal Society B: Biological Sciences* vol. 366 3532–3544 (2011).
- 887 38. Zatulovskiy, E., Zhang, S., Berenson, D. F., Topacio, B. R. & Skotheim, J. M.  
888 Cell growth dilutes the cell cycle inhibitor Rb to trigger cell division. *Science*  
889 (80-. ). **369**, 466–471 (2020).
- 890 39. Nano, M. *et al.* Cell-Cycle Asynchrony Generates DNA Damage at Mitotic  
891 Entry in Polyploid Cells. *Curr. Biol.* **29**, (2019).
- 892 40. Frawley, L. E. & Orr-Weaver, T. L. Polyploidy. *Current Biology* vol. 25 R353–  
893 R358 (2015).
- 894 41. Tseng, A.-S. K. & Hariharan, I. K. *An Overexpression Screen in Drosophila for*  
895 *Genes That Restrict Growth or Cell-Cycle Progression in the Developing Eye.*  
896 (2002).
- 897 42. Duronio, R. J., Brook, A., Dyson, N. & O’Farrell, P. H. E2F-induced S phase  
898 requires cyclin E. *Genes Dev.* **10**, 2505–2513 (1996).
- 899 43. Maya-Mendoza, A. *et al.* High speed of fork progression induces DNA

- 900 replication stress and genomic instability. *Nature* **559**, 279–284 (2018).
- 901 44. Sedlackova, H. *et al.* Equilibrium between nascent and parental MCM proteins  
902 protects replicating genomes. *Nature* **587**, 297–302 (2020).
- 903 45. M, T. *et al.* Functional reprogramming of polyploidization in megakaryocytes.  
904 *Dev. Cell* **32**, 155–167 (2015).
- 905 46. Klusza, S. & Deng, W.-M. At the crossroads of differentiation and proliferation:  
906 Precise control of cell-cycle changes by multiple signaling pathways in  
907 *Drosophila* follicle cells. *Bioessays* **33**, 124 (2011).
- 908 47. Viganó, C. *et al.* Quantitative proteomic and phosphoproteomic comparison of  
909 human colon cancer DLD-1 cells differing in ploidy and chromosome stability.  
910 *Mol. Biol. Cell* **29**, 1031–1047 (2018).
- 911 48. Wangsa, D. *et al.* Near-tetraploid cancer cells show chromosome instability  
912 triggered by replication stress and exhibit enhanced invasiveness. *FASEB J.*  
913 **32**, 3502–3517 (2018).
- 914 49. Hégarat, N. *et al.* Cyclin A triggers Mitosis either via the Greatwall kinase  
915 pathway or Cyclin B. *EMBO J.* **39**, (2020).
- 916 50. SB, K. *et al.* A quantitative FastFUCCI assay defines cell cycle dynamics at a  
917 single-cell level. *J. Cell Sci.* **130**, 512–520 (2017).
- 918 51. KS, Y., RH, K., M, L., R, G. & R, W. Single cell resolution in vivo imaging of  
919 DNA damage following PARP inhibition. *Sci. Rep.* **5**, (2015).
- 920 52. Karess, R. E. *et al.* The regulatory light chain of nonmuscle myosin is encoded  
921 by spaghetti-squash, a gene required for cytokinesis in *Drosophila*. *Cell* **65**,  
922 1177–1189 (1991).
- 923 53. Gemble, S. *et al.* Centromere Dysfunction Compromises Mitotic Spindle Pole  
924 Integrity. *Curr. Biol.* **29**, (2019).
- 925 54. J, L., BO, P., K, H., J, B. & K, H. Deregulated expression of E2F family  
926 members induces S-phase entry and overcomes p16INK4A-mediated growth  
927 suppression. *Mol. Cell. Biol.* **16**, 1047–1057 (1996).
- 928 55. Sakaue-Sawano, A. *et al.* Visualizing Spatiotemporal Dynamics of Multicellular  
929 Cell-Cycle Progression. *Cell* **132**, 487–498 (2008).
- 930 56. Aknoun, S. *et al.* Living cell dry mass measurement using quantitative phase  
931 imaging with quadriwave lateral shearing interferometry: an accuracy and  
932 sensitivity discussion. *J. Biomed. Opt.* **20**, 126009 (2015).
- 933 57. Bon, P., Maucort, G., Wattellier, B. & Monneret, S. Quadriwave lateral shearing

- 934 interferometry for quantitative phase microscopy of living cells. *Opt. Express*  
935 **17**, 13080 (2009).
- 936 58. van den Bos, H. *et al.* Quantification of aneuploidy in mammalian systems. in  
937 *Methods in Molecular Biology* vol. 1896 159–190 (Humana Press Inc., 2019).
- 938 59. Langmead, B. & Salzberg, S. L. Fast gapped-read alignment with Bowtie 2.  
939 *Nat. Methods* **9**, 357–359 (2012).
- 940 60. Jun, G., Wing, M. K., Abecasis, G. R. & Kang, H. M. An efficient and scalable  
941 analysis framework for variant extraction and refinement from population-scale  
942 DNA sequence data. *Genome Res.* **25**, 918–925 (2015).
- 943 61. Bakker, B. *et al.* Single-cell sequencing reveals karyotype heterogeneity in  
944 murine and human malignancies. *Genome Biol.* **17**, (2016).
- 945 62. van den Bos, H. *et al.* Single-cell whole genome sequencing reveals no  
946 evidence for common aneuploidy in normal and Alzheimer’s disease neurons.  
947 *Genome Biol.* **17**, 1–9 (2016).
- 948



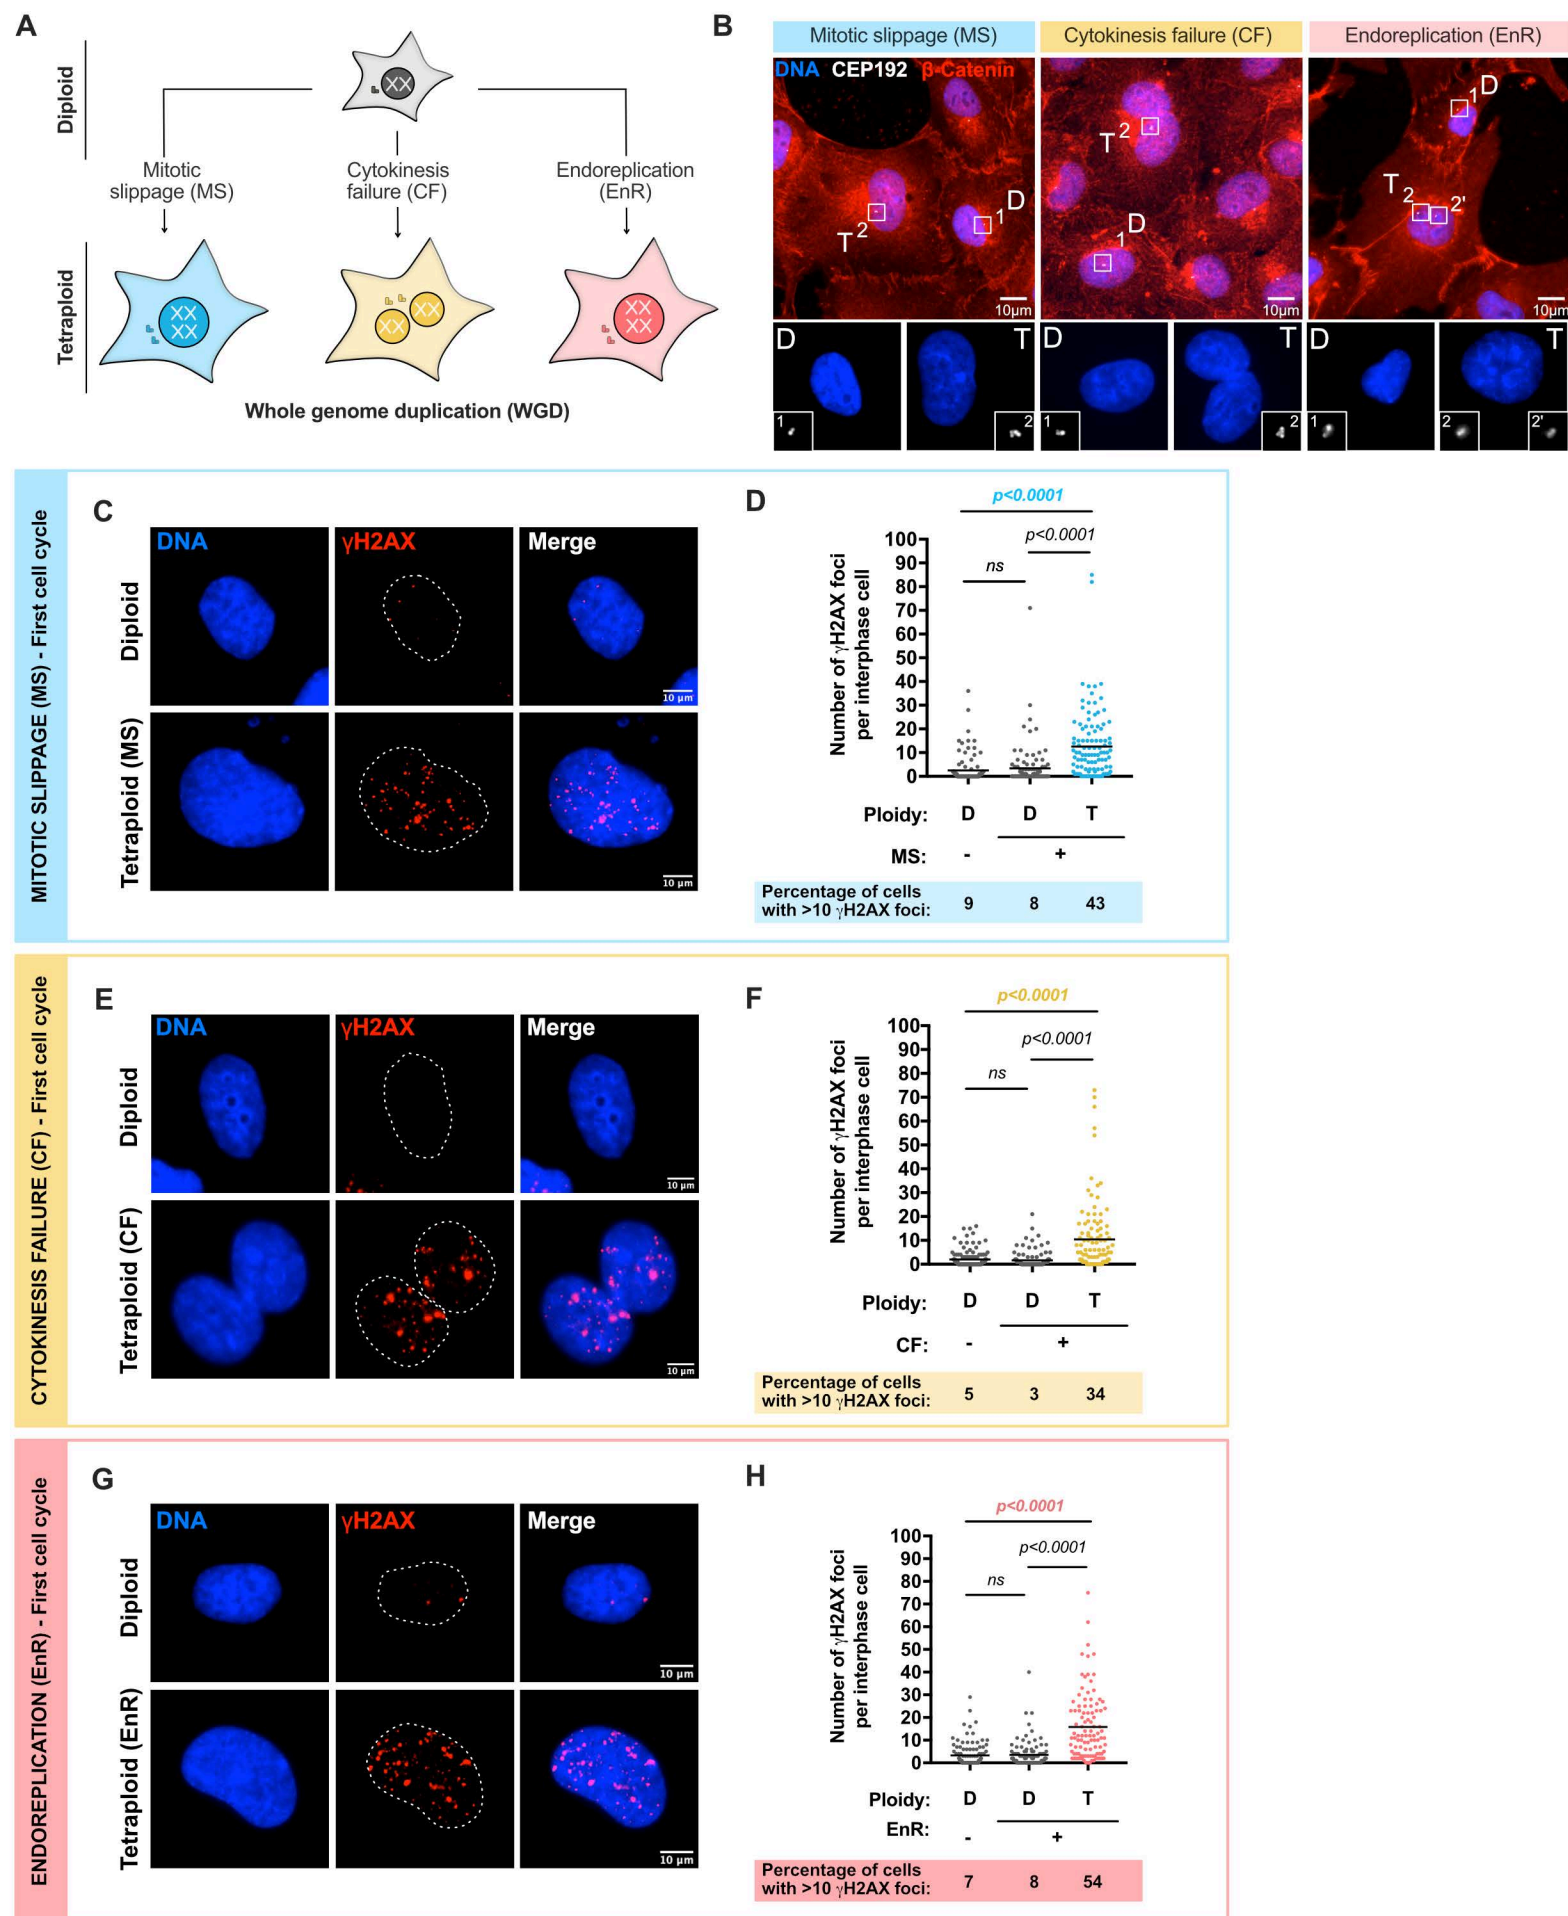

**Figure 1: High levels of DNA damage are generated in the first interphase following unscheduled WGD.**

**(A)** Schematic representation of the generation of tetraploid cells. **(B)** Representative immunofluorescence images of diploid and tetraploid RPE-1 cells generated by inhibiting Eg5 and MPS1 (MS), or MKLP1 (CF), or JNK (EnR). DNA was visualized using DAPI (in blue), centrosomes were stained using anti-CEP192 antibodies (in white) and membranes were stained using anti- $\beta$ -Catenin antibodies (in red). The white squares correspond to higher magnifications presented in the lower panel and showing the centrosomes (in yellow). **(C, E and G)** Representative immunofluorescence images showing DNA damage in diploid and tetraploid RPE-1 cells were generated by inhibiting Eg5 and MPS1 (MS), or MPS1 (CF), or JNK (EnR). DNA was visualized using DAPI (in blue), DNA damage was visualized using anti- $\gamma$ H2AX antibodies (in red). >100 interphase cells were analyzed from at least three independent experiments. **(D, F and H)** Graph showing the number of  $\gamma$ H2AX foci per interphase cells in diploid and tetraploid RPE-1 cells. The percentage of interphase cells with more than 10  $\gamma$ H2AX foci in diploid and tetraploid RPE-1 cells were indicated under the graph. >100 interphase cells were analyzed from at least three independent experiments. The dotted lines indicate the nuclear area. D: Diploid. T: Tetraploid. MS: mitotic slippage. CF: cytokinesis failure. EnR: endoreplication.

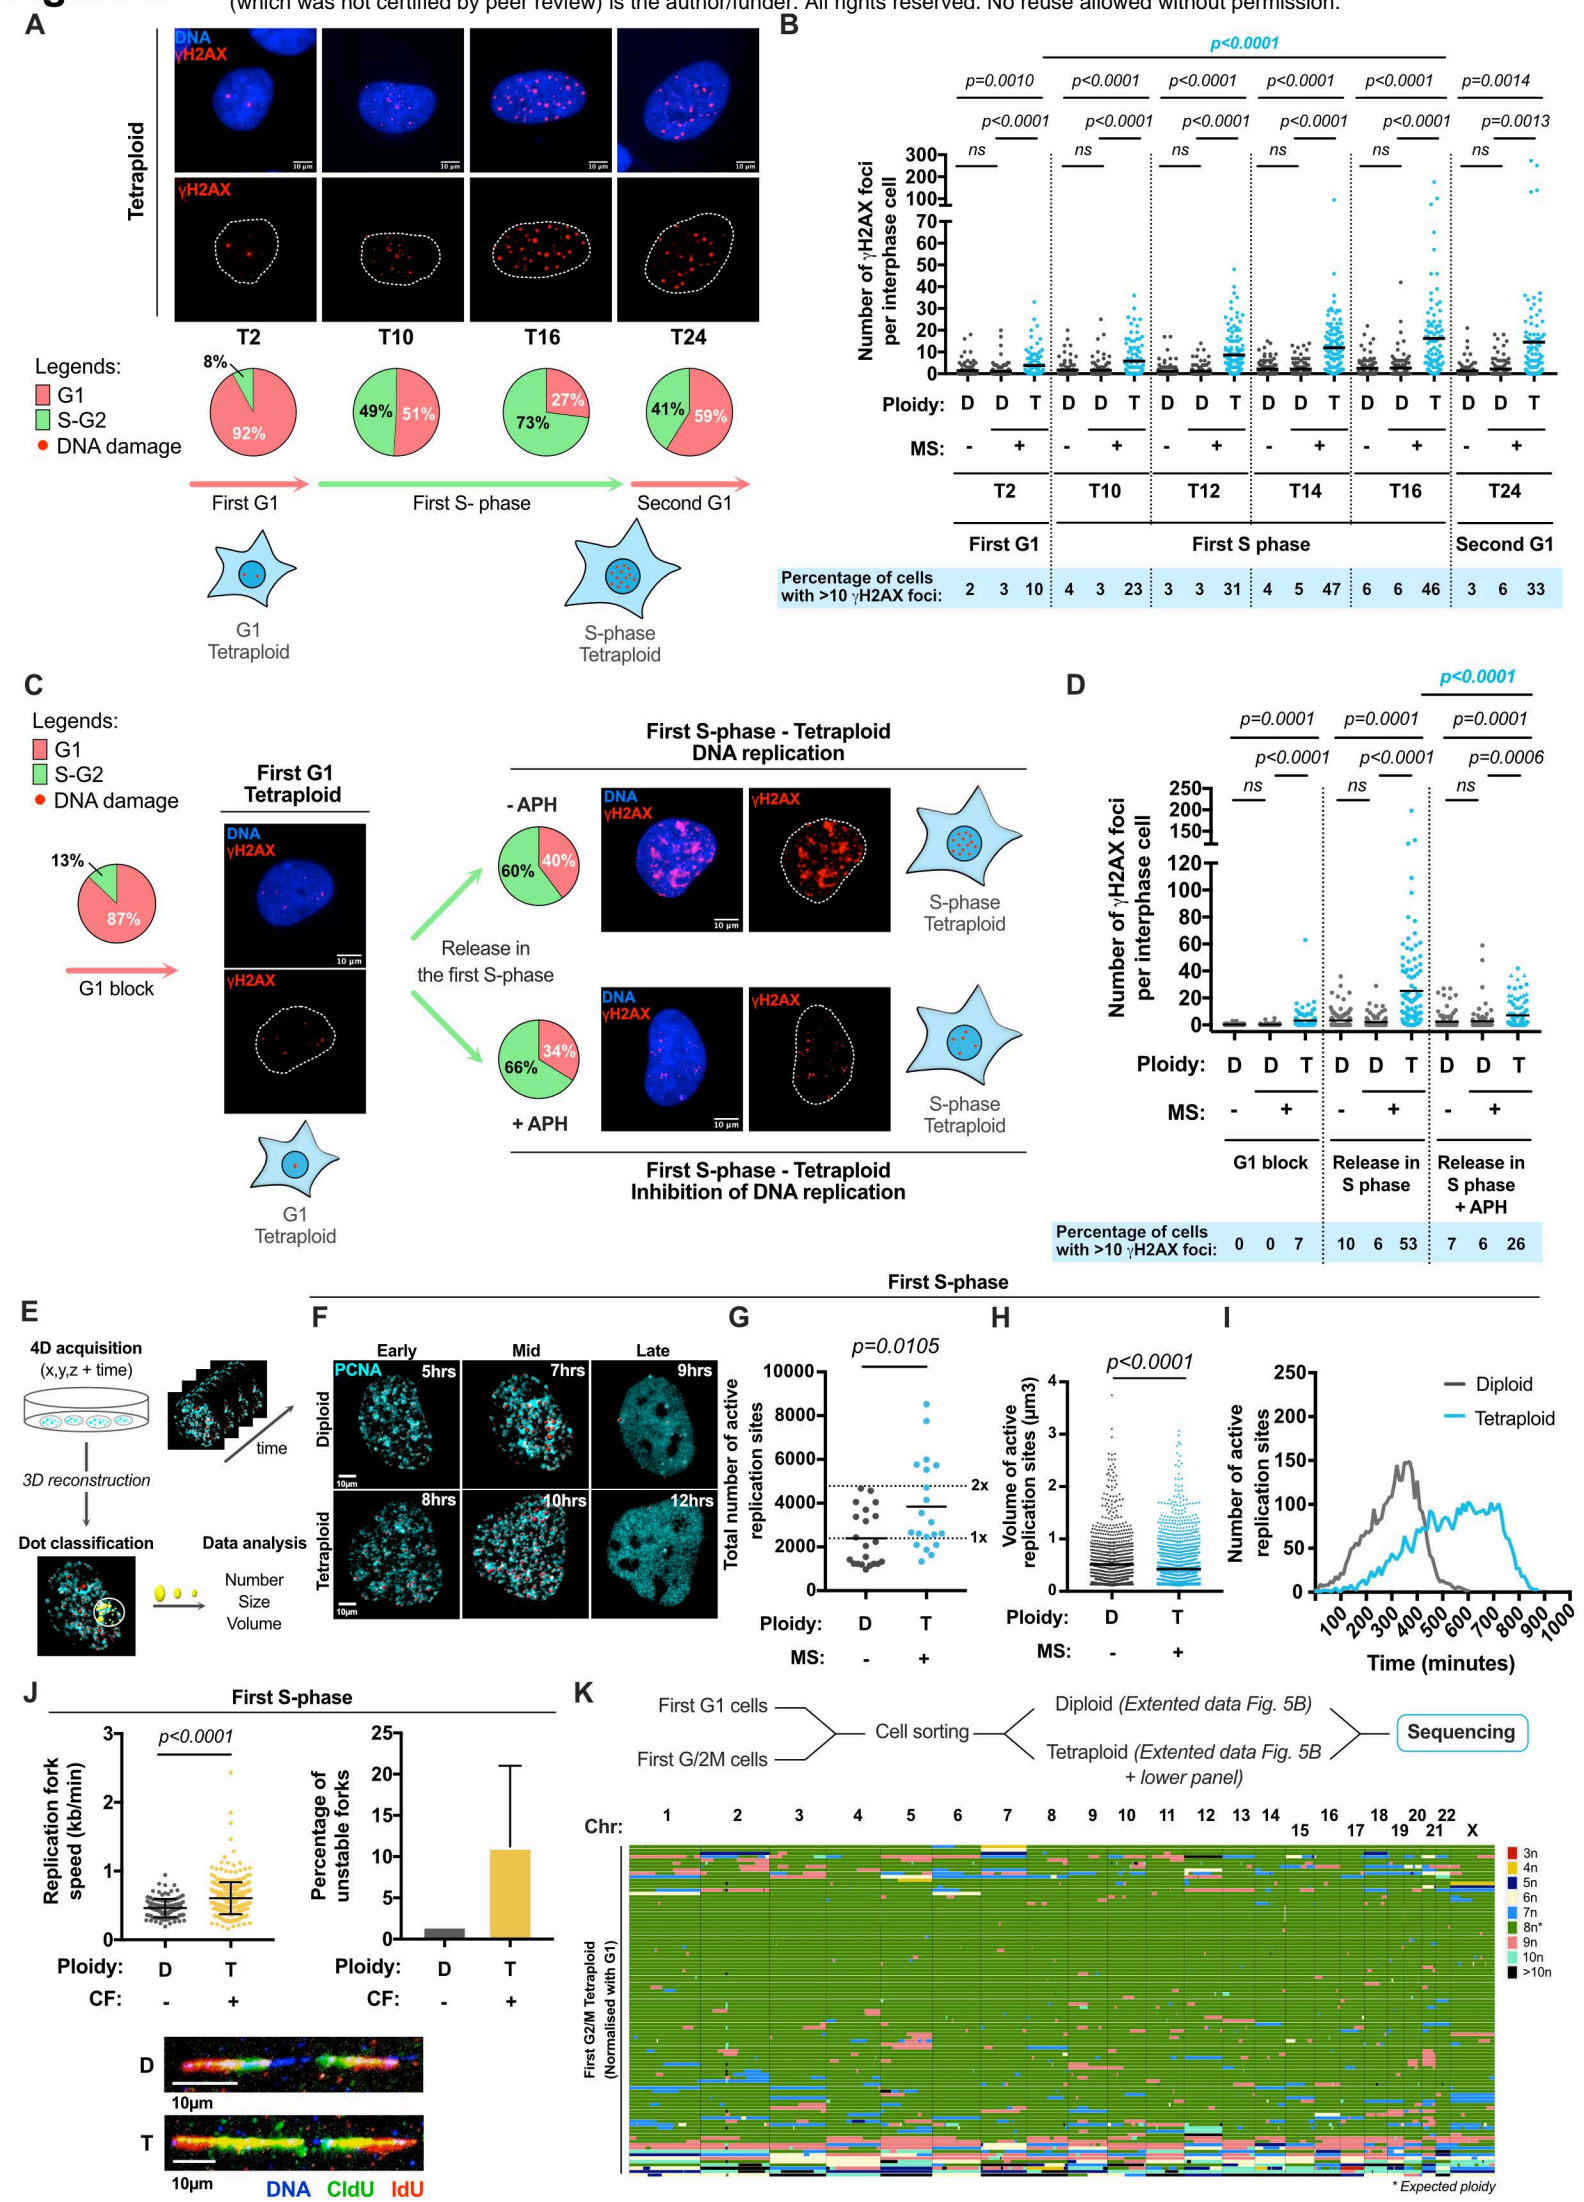

**Figure 2: DNA damage and genetic instability in tetraploid cells is generated during S-phase in a DNA replication-dependent manner.**

**(A)** Upper panel - Representative immunofluorescence images showing DNA damage in RPE-1 tetraploid cells over time. DNA was visualized using DAPI (in blue), DNA damage is visualized using anti- $\gamma$ H2AX antibodies (in red). Lower panel - Percentage of RPE-1 FUCCI tetraploid cells in G1 (red) or in S-G2 (green) over time. **(B)** Graph representing the number of  $\gamma$ H2AX foci per interphase cells in diploid (gray) and tetraploid (blue) RPE-1 cells over time. The percentage of interphase cells with more than 10  $\gamma$ H2AX foci in diploid and tetraploid RPE-1 cells is indicated under the graph. >100 interphase cells were analyzed from at least three independent experiments. **(C)** Percentage of RPE-1 FUCCI tetraploid cells in G1 (red) or in S-G2 (green) and representative immunofluorescence images showing DNA damage in tetraploid cells synchronized in G1 using 1 $\mu$ M palbociclib or released in S-phase with or without 400nM aphidicolin (APH). DNA was visualized using DAPI (in blue), DNA damage was visualized using anti- $\gamma$ H2AX antibodies (in red). **(D)** Graph showing the number of  $\gamma$ H2AX foci per interphase cells in diploid (gray) and tetraploid (blue) RPE-1 cells synchronized in G1 using 1 $\mu$ M palbociclib or released in S-phase with or without 400nM aphidicolin (APH). The percentage of interphase cells with more than 10  $\gamma$ H2AX foci in diploid and tetraploid RPE-1 cells are indicated under the graph. >100 interphase cells were analyzed from at least three independent experiments. **(E)** Schematic workflow showing the method used in this study to process and analyze DNA replication by live imaging. **(F)** Stills of time lapse of diploid and tetraploid RPE-1 PCNA<sup>chromo</sup> cells. Active replication sites are visualized using PCNA chromobodies (in cyan) and reconstructed using Imaris in 3D (in red). **(G)** Graph showing the total number of active replication sites during S-phase in diploid (gray) and tetraploid (blue) RPE-1 cells. >20 S-phase cells were analyzed from three independent experiments. **(H)** Graph showing the volume of active replication sites in  $\mu\text{m}^3$  in diploid (gray) and tetraploid (blue) RPE-1 PCNA<sup>chromo</sup> cells. At least 1000 active replication sites were analyzed. **(I)** Graph showing the mean number of active replication sites over time in diploid (gray line) and tetraploid (blue line) RPE-1 cells. >20 S-phase cells were analyzed from three independent experiments. For other representative examples, see Figure S5A. **(J)** Left panel - Graph representing the replication fork speed in diploid (gray) and tetraploid (yellow) HCT116 cells. Right panel - Graph showing the percentage of unstable replication forks in diploid (gray) and tetraploid (yellow) HCT116 cells. More than 120 replication forks were analyzed. Lower panel - Representative immunofluorescence of DNA fibers obtained from diploid and tetraploid HCT116 cells. ssDNA was visualized using anti-ssDNA antibodies (in blue), CldU and IdU was visualized using anti-IdU and anti-CldU antibodies (in red and green), respectively. **(K)** Genome-wide copy number plots G2/M tetraploid RPE-1 cells were generated using a modified version of the Aneupfinder algorithm and normalized using G1 tetraploid cells (see methods). Each row represents a cell and the copy number state (in 5-Mb bins) is indicated in colors (with aberrations contrasting from from dark green in G2/M (8n)). The dotted lines indicate nuclear area. D: Diploid. T: Tetraploid. MS: mitotic slippage. CF: cytokinesis failure. EnR: endoreplication.

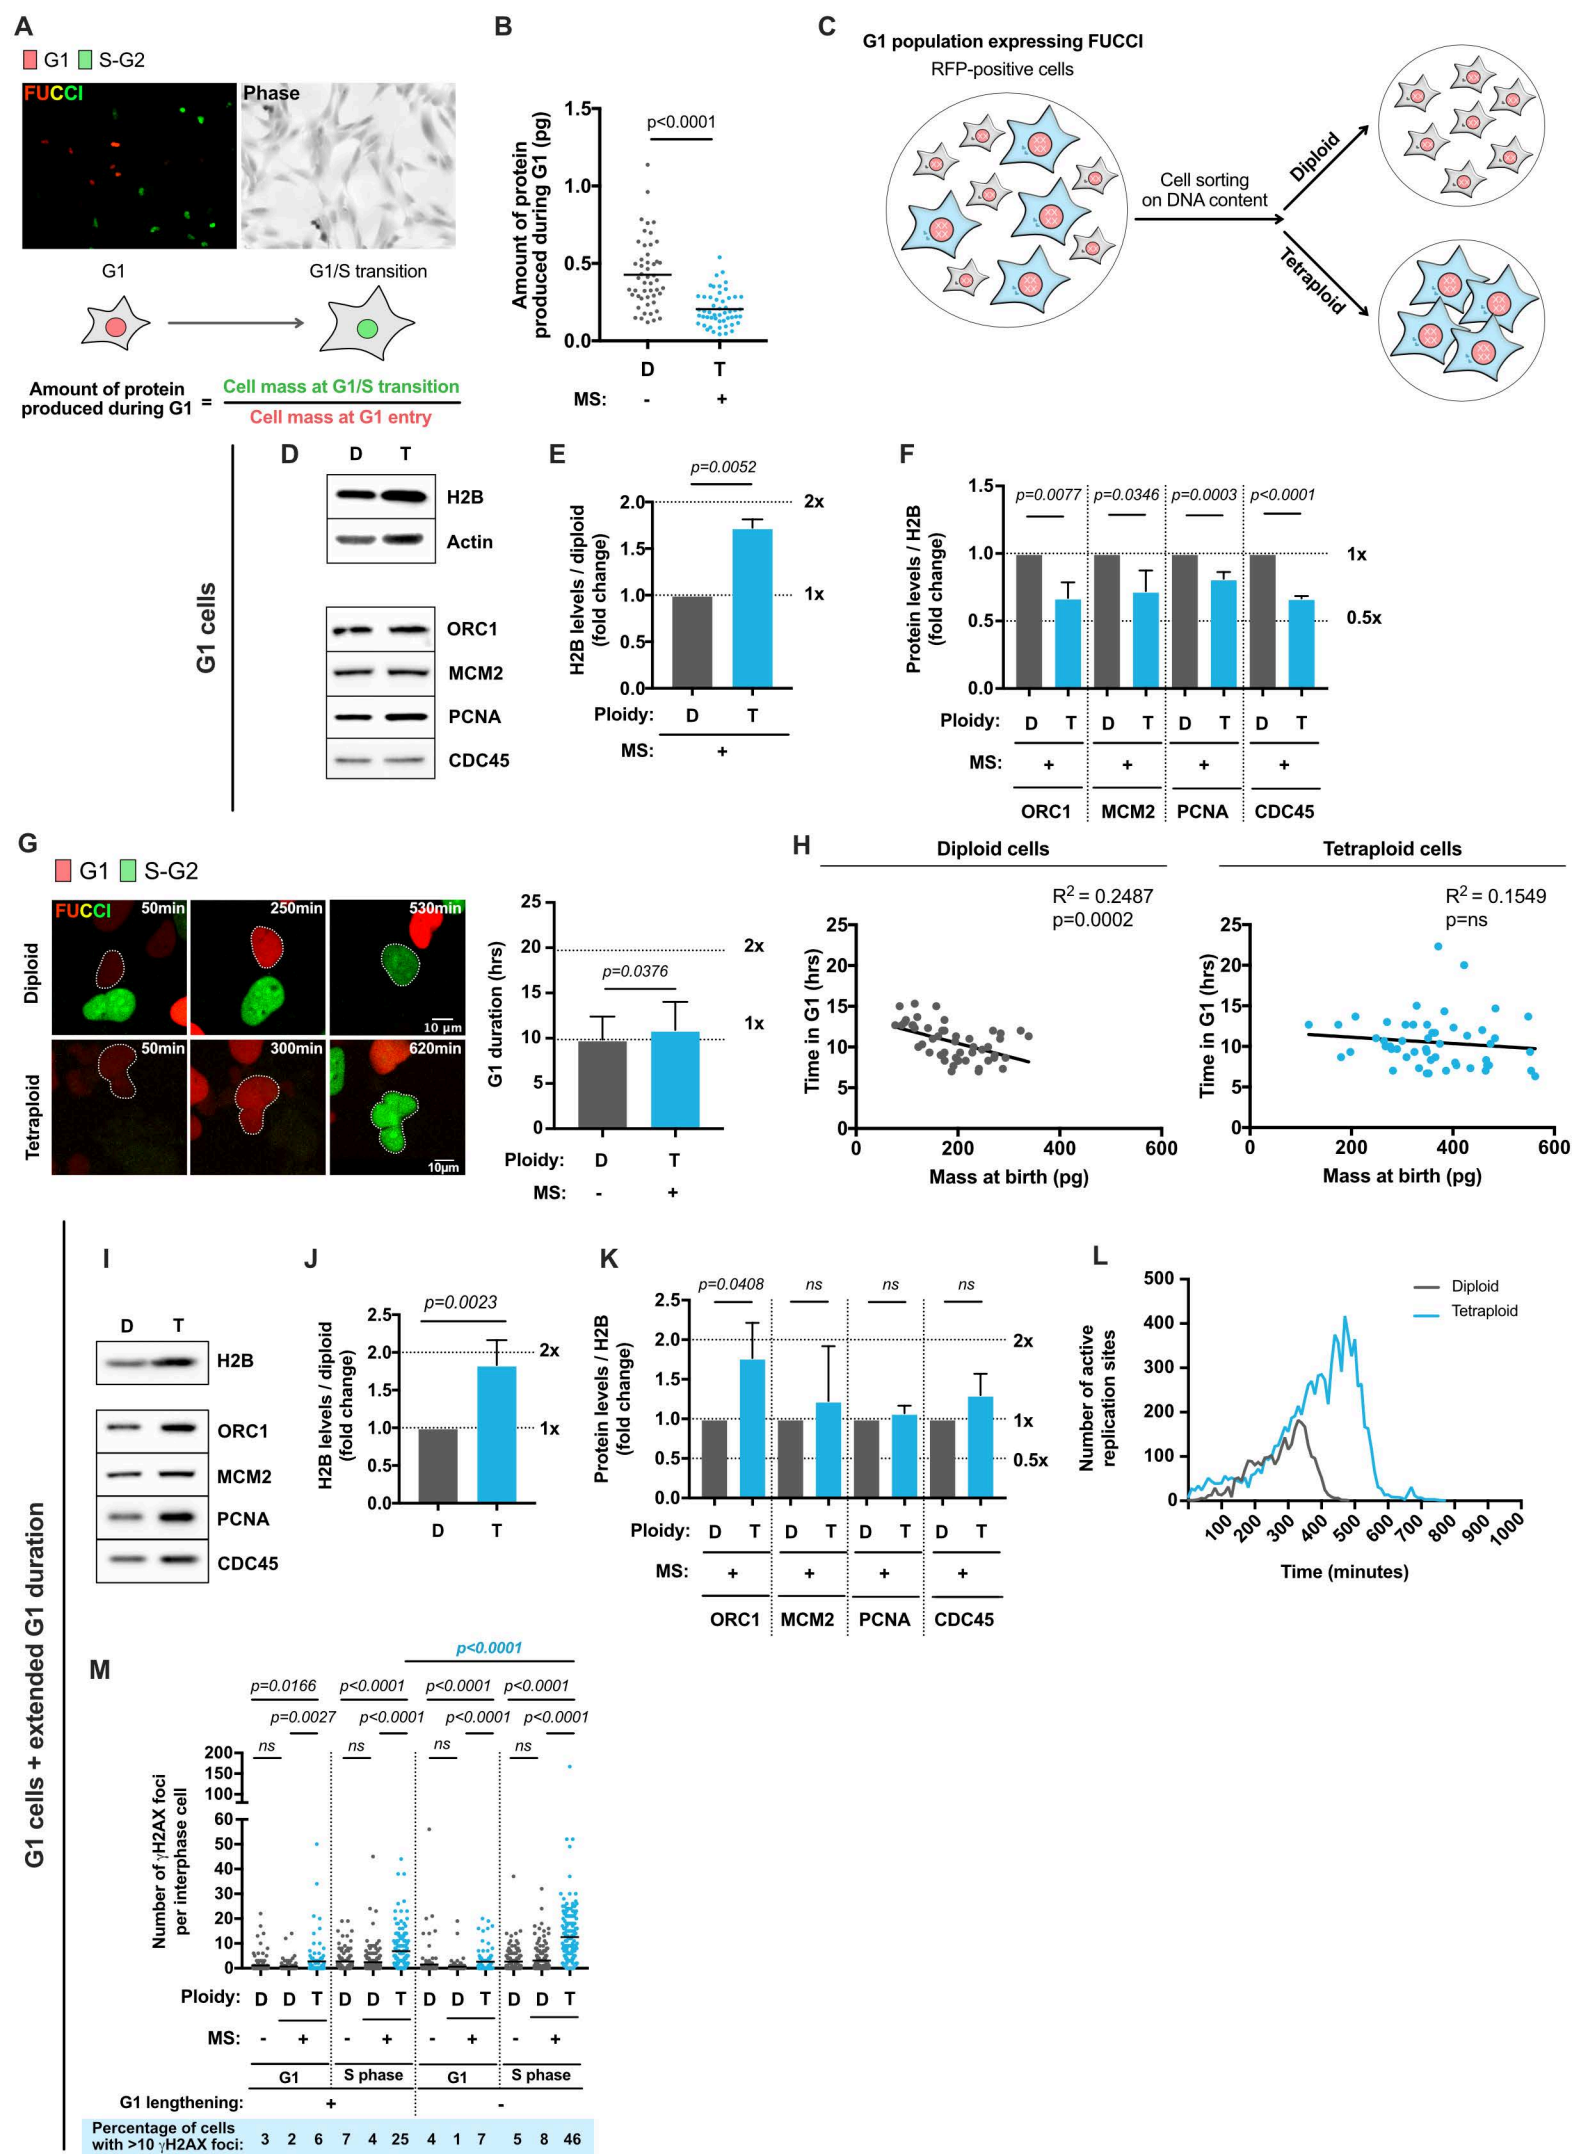

**Figure 3: Lack of G1 lengthening in tetraploid cells leads to unprepared S-phase.**

**(A)** Stills of time lapse of RPE CCNB1<sup>AID</sup> FUCCI diploid and tetraploid cells. G1 cells are in red and S-G2 cells are in green. **(B)** Graph representing the amount of protein produced during G1 in diploid (gray) and tetraploid (blue) RPE-1 CCNB1<sup>AID</sup> FUCCI cells. **(C)** Schematic representation of cell sorting of G1 diploid and tetraploid cells. At least 50 cells were analyzed. **(D)** H2B, actin, ORC1, MCM2, PCNA and Cdc45 levels assessed by western blot of cell lysates obtained from diploid (left) and tetraploid (right) RPE-1 CCNB1<sup>AID</sup> FUCCI cells. The same number of cells was loaded for each condition. **(E)** Graph showing H2B levels normalized with diploid condition (fold change) in diploid (gray) and tetraploid (blue) cells. Mean +/- sd representing three independent experiments. **(F)** Graph representing the protein levels relative to H2B levels (fold change) in diploid (gray) and tetraploid (blue) cells. Mean +/- sd representing three independent experiments. **(G)** Left panel – Stills of time lapse of RPE FUCCI diploid and tetraploid cells. G1 cells are in red and S-G2 cells are in green. Right panel - Graph showing the time in G1 compared to the mass at birth in diploid (left panel, gray) and tetraploid (right panel, blue) RPE-1 FUCCI cells. At least 55 interphase cells from two independent experiments were analyzed. **(H)** Graph showing the correlation between the time in G1 and the mass at birth in diploid and tetraploid RPE-1 CCNB1<sup>AID</sup> FUCCI cells. At least 50 interphase cells were analyzed. **(I)** H2B, ORC1, MCM2, PCNA and Cdc45 levels assessed by western blot of cell lysates obtained from diploid (left) and tetraploid (right) RPE-1 CCNB1<sup>AID</sup> FUCCI cells with extended G1 duration. The same number of cells was loaded for each condition. **(J)** Graph showing H2B levels normalized with diploid condition (fold change) in diploid (gray) and tetraploid (blue) cells with extended G1 duration. Mean +/- sd representing three independent experiments. **(K)** Graph representing the protein levels relative to H2B levels (fold change) in diploid (gray) and tetraploid (blue) cells with extended G1 duration. Mean +/- sd representing three independent experiments. **(L)** Graph showing the average number of active replication sites over time in diploid (gray line) or tetraploid (blue line) RPE PCNA<sup>chromo</sup> cells with extended G1 duration. For other representative examples, see Figure S6L. **(M)** Graph showing the number of  $\gamma$ H2AX foci in interphase cells in diploid (gray) and tetraploid cells (blue) synchronized in G1 using 160nM (extended G1 duration) or 1 $\mu$ M (G1 arrest) palbociclib or released in S-phase. At least 100 interphase cells were analyzed from three independent experiments. D: Diploid. T: Tetraploid. MS: mitotic slippage.

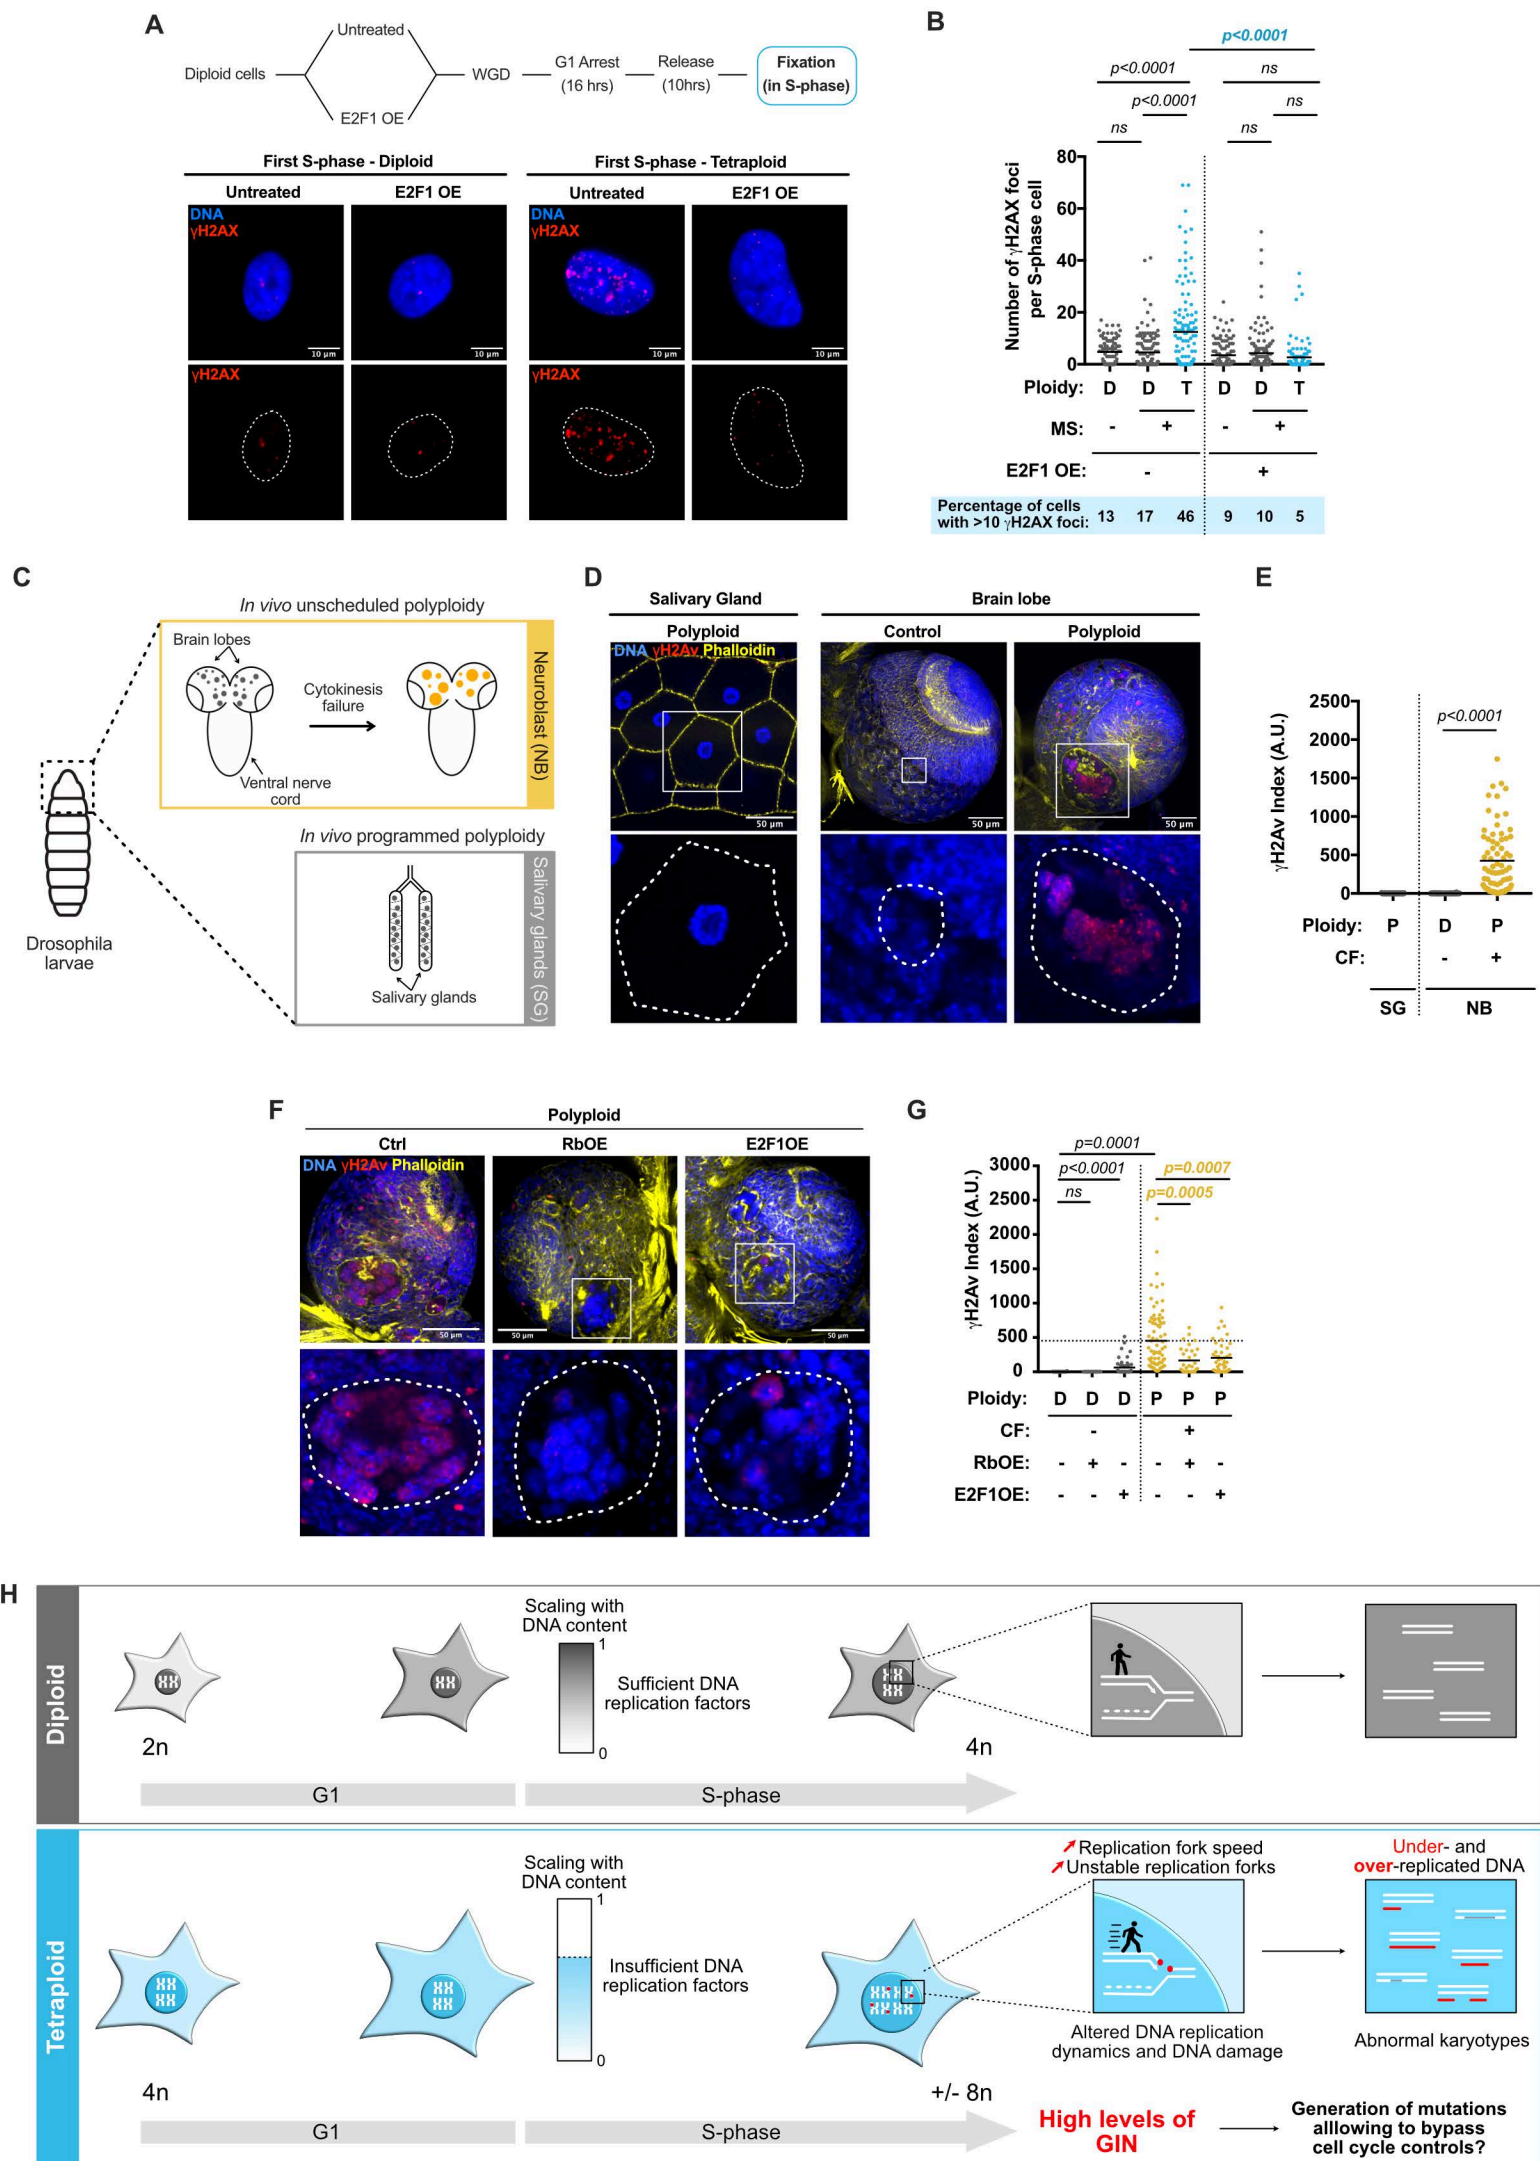

**Figure 4: G1 lengthening or increased E2F1 levels are sufficient to rescue GIN in tetraploid cells and in polyploid cells *in vivo*.**

**(A)** Upper panel - Schematic workflow showing the method used to overexpress E2F1. Lower panel - Representative immunofluorescence images showing DNA damage in RPE-1 tetraploid cells overexpressing or not E2F1. DNA was visualized using DAPI (in blue), DNA damage was visualized using anti- $\gamma$ H2AX antibodies (in red). **(B)** Graph showing the number of  $\gamma$ H2AX foci per interphase cells in diploid (gray) and tetraploid (blue) RPE-1 cells released in S-phase with or without E2F1 overexpression. The percentage of interphase cells with more than 10  $\gamma$ H2AX foci in diploid and tetraploid RPE-1 cells were indicated under the graph. >100 interphase cells were analyzed from at least three independent experiments. **(C)** Schematic representation of the brain of *drosophila* larvae. **(D)** Representative immunofluorescence images of *drosophila* brain lobe in control or *sqh* mutant (polyploid) and of salivary glands. DNA was visualized using DAPI (in blue), DNA damage was visualized using anti- $\gamma$ H2Av antibodies (in red), membranes were visualized using Phalloidin (in yellow). **(E)**  $\gamma$ H2Av index in *drosophila* salivary glands (SG, gray) or in diploid (gray) and polyploid (yellow) neuroblasts (NB). At least 60 cells were analyzed per condition. **(F)** Representative immunofluorescence images of *drosophila* brain lobe in control or *sqh* mutant (polyploid) overexpressing or not E2F1. DNA was visualized using DAPI (in blue), DNA damage was visualized using anti- $\gamma$ H2Av antibodies (in red), membranes were visualized using Phalloidin (in yellow). **(G)** Graph showing the  $\gamma$ H2Av index in diploid (gray) and polyploid (yellow) *drosophila* neuroblasts overexpressing or not E2F1. At least 30 cells were analyzed per condition. **(H)** Tetraploid cells are not able to sense an increase in DNA content and to adapt G1 duration. In consequence, G1 duration is not scaled up with DNA content and tetraploid cells enter S-phase with an insufficient amount of replication factors generating DNA replication-dependent DNA damage and abnormal karyotypes. The dotted lines indicate the nuclear (B) or cell area (D and F). The white squares correspond to higher magnifications presented in the lower panel. D: Diploid. T: Tetraploid. P: Polyploid. CF: cytokinesis failure. MS: mitotic slippage.
